1 **Interleukin-6 trans-signaling is a candidate mechanism to drive progression of**  
2 **human DCCs during periods of clinical latency**

3  
4 Melanie Werner-Klein<sup>1,#,\*</sup>, Ana Grujovic<sup>1,#</sup>, Christoph Irlbeck<sup>1</sup>, Milan Obradovic<sup>1</sup>, Martin  
5 Hoffmann<sup>2</sup>, Huiqin Koerkel-Qu<sup>1</sup>, Xin Lu<sup>2</sup>, Steffi Treitschke<sup>2</sup>, Cäcilia Köstler<sup>2</sup>, Catherine  
6 Botteron<sup>2</sup>, Kathrin Weidele<sup>2</sup>, Christian Werno<sup>2</sup>, Bernhard Polzer<sup>2</sup>, Stefan Kirsch<sup>2</sup>,  
7 Miodrag Guzvic<sup>1</sup>, Jens Warfsmann<sup>2</sup>, Kamran Honarnejad<sup>2</sup>, Zbigniew Czyz<sup>1</sup>, Isabell  
8 Blochberger<sup>1</sup>, Sandra Grunewald<sup>1</sup>, Elisabeth Schneider<sup>1</sup>, Gundula Haunschild<sup>1</sup>, Nina  
9 Patwary<sup>1</sup>, Severin Guetter<sup>1</sup>, Sandra Huber<sup>1</sup>, Stefan Buchholz<sup>3</sup>, Petra Rümmele<sup>4,5</sup>,  
10 Norbert Heine<sup>6</sup>, Stefan Rose-John<sup>7</sup> & Christoph A. Klein<sup>1,2,\*</sup>

11  
12 <sup>1</sup>Experimental Medicine and Therapy Research, University of Regensburg, Regensburg,  
13 Germany

14 <sup>2</sup>Fraunhofer Institute for Toxicology and Experimental Medicine, Division of Personalized  
15 Tumour Therapy, Regensburg, 93053, Germany

16 <sup>3</sup>University Medical Center Regensburg, Clinic of Gynecology and Obstetrics, Regensburg,  
17 Germany

18 <sup>4</sup>Department of Pathology, University of Regensburg, Franz-Josef Strauss Allee 11, 93053  
19 Regensburg, Germany.

20 <sup>5</sup>Institute of Pathology, University Hospital,  
21 Friedrich-Alexander-University Erlangen-Nürnberg, Krankenhausstr. 8-10, 91054 Erlangen,  
22 Germany.

23 <sup>6</sup>University Center of Plastic-, Aesthetic, Hand- and Reconstructive Surgery, University  
24 of Regensburg, Germany

25 <sup>7</sup>Institute of Biochemistry, Christian-Albrechts-Universität Kiel, Kiel, Germany

26 \*Corresponding authors: [melanie.werner-klein@ukr.de](mailto:melanie.werner-klein@ukr.de), [Christoph.klein@ukr.de](mailto:Christoph.klein@ukr.de)

27 # authors contributed equally

28 **Abstract**

29 Although thousands of breast cancer cells disseminate and home to bone marrow until  
30 primary surgery, usually less than a handful will succeed in establishing manifest  
31 metastases months to years later. To identify signals that support survival or outgrowth  
32 in patients, we profiled rare bone marrow-derived disseminated cancer cells (DCCs)  
33 long before manifestation of metastasis and identified IL6/PI3K-signaling as candidate  
34 pathway for DCC activation. Surprisingly, and similar to mammary epithelial cells,  
35 DCCs lacked membranous IL6 receptor expression and mechanistic dissection  
36 revealed IL6 trans-signaling to regulate a stem-like state of mammary epithelial cells  
37 via gp130. Responsiveness to IL6 trans-signals was found to be niche-dependent as  
38 bone marrow stromal and endosteal cells down-regulated gp130 in premalignant  
39 mammary epithelial cells as opposed to vascular niche cells. *PIK3CA* activation  
40 rendered cells independent from IL6 trans-signaling. Consistent with a bottleneck  
41 function of microenvironmental DCC control, we found *PIK3CA* mutations highly  
42 associated with late-stage metastatic cells while being extremely rare in early DCCs.  
43 Our data suggest that the initial steps of metastasis formation are often not cancer cell-  
44 autonomous, but also depend on microenvironmental signals.

45 **Word count:** 175

46

47

48

## 49 **Introduction**

50 In breast cancer, dissemination to distant sites precedes the clinical manifestation of  
51 metastasis by six to eight years in median, ranging from less than one year to more  
52 than 40 years<sup>1-3</sup>. These clinical data derived from breast cancer growth kinetics and  
53 imaging studies are strongly supported by recent experimental evidence. Whereas  
54 dissemination from the primary site occurs preferentially in early tumor stages<sup>4-6</sup>,  
55 specific mechanisms reduce cancer cell dissemination in anatomically and molecularly  
56 advanced stages<sup>5</sup>. Furthermore, analysis of cancer growth kinetics suggests that not  
57 only cancer cells disseminate early, but also that micro-metastatic colony formation is  
58 initiated early. However, its manifestation may take considerable time<sup>1, 3, 7</sup>. Such data  
59 are consistent with the observation that early DCCs often lack critical genetic and  
60 genomic alterations, which they need to acquire at the distant site in breast and other  
61 cancers. This process could explain the much longer clinical latency periods observed  
62 in humans as compared to mouse models<sup>5, 8, 9</sup> and be particularly relevant for cancers  
63 displaying late relapses such as hormone receptor positive breast cancer. However,  
64 early dissemination and prolonged clinical latency at distant sites raise questions about  
65 the identity and nature of signals conferring survival, genomic progression and  
66 outgrowth of DCCs over extended periods of time.

67 DCCs are extremely rare. They are detected at very low frequencies (1-2 DCCs  
68 per  $10^6$  BM cells<sup>10, 11</sup>) in bone marrow (BM) of about 30% of breast cancer patients  
69 with no evidence of manifest metastasis. Besides genomic studies, the assessment of  
70 the DCC phenotype has been limited to testing for selected antigens<sup>12</sup> and to  
71 anecdotal transcriptomic studies<sup>13, 14</sup>. Moreover, spontaneous or transgenic mouse  
72 models, such as the PyMT- or Her2-driven models, do not generate bone metastases.  
73 Hence, there is no *in vivo* model available to study the spontaneous progression and

74 genomic evolution from early BM infiltration to manifestation of bone metastasis. To  
75 unravel mechanisms operative during clinical latency periods, we interrogated  
76 transcript-derived pathway information from DCCs isolated from BM of breast cancer  
77 patients. Since early breast cancer DCCs often display close-to-normal genomes<sup>5, 15</sup>,  
78 we used mammary epithelial cells isolated from reduction mammoplasties and  
79 available immortalized pre-malignant breast cancer cell lines as cellular models for  
80 functional testing of candidate mechanisms *in vitro*. We identified IL6 trans-signaling  
81 as pathway that (i) activates normal and pre-malignant cells, (ii) induces a proliferative  
82 stem/progenitor-like phenotype in mammary epithelial cells and (iii) whose activation  
83 in DCCs depends on regulatory niche cells in bone marrow. These data shed light onto  
84 the so far dark stage of early metastasis formation in patients. Moreover, it may inform  
85 about future ways to delay or prevent metachronous metastasis in patients whose  
86 breast cancer is diagnosed to be locally confined by standard clinical means.

87

## 88 **Results**

### 89 **Early DCCs do not engraft in immunodeficient mice**

90 For decades attempts to culture early DCCs, i.e. DCCs from non-metastasized M0-  
91 stage patients, have failed. Only anecdotal reports have been published that were not  
92 reproduced since then<sup>16-18</sup>. We recently observed in melanoma that early DCCs failing  
93 to generate xenografts differ genomically from DCCs that successfully engrafted,  
94 indicating a causative role of genomic “maturation” for metastasis and xenograft  
95 formation. Specific alterations were identified that are closely linked to colonization  
96 success in mice and patients<sup>9</sup>. We repeated these experiments for BM-derived breast  
97 and prostate cancer DCCs from early (M0) and advanced (M1) stages. Given the very

98 low frequency of BM-DCCs ( $<10^{-6}$ ), we either injected CD45 depleted or EpCAM-  
99 enriched BM cells or generated and transplanted spheres as these have a higher  
100 engraftment-likelihood<sup>9</sup>. In total, we tested 42 patient samples and different routes of  
101 application, including sub-cutaneous, orthotopic (site of origin), intra-femoral and intra-  
102 venous injection. We then assessed tumor formation at the cutaneous injection sites  
103 and metastatic spread to lungs or BM. BM-derived DCCs from M1-stage patients  
104 engrafted in two out of four cases. In contrast, early DCCs from 42 M0-stage patients  
105 did not establish xenografts (Fig. 1a, b), neither at the injection sites nor in the lungs  
106 ( $p = 0.006$ ; Fisher's exact test). We also explored the presence of minimal systemic  
107 cancer by testing for human cytokeratin (CK) or EpCAM-positive cells in murine BM.  
108 Interestingly, albeit DCCs of non-metastatic patients did not expand in mice, they  
109 survived in murine BM in 4 out of 42 cases. We detected human EpCAM<sup>+</sup> or CK<sup>+</sup> DCCs  
110 at a frequency of 1-5 DCCs/million BM cells 4-14 weeks after injection of CD45-  
111 depleted human BM cells (Fig. 1c). For one of these rare events we could not only  
112 prove human and epithelial, but also malignant origin by single cell copy number  
113 alteration (CNA) analysis (Fig. 1d).

114 In summary and consistent with our findings in melanoma, early DCCs from patients  
115 without manifest metastasis failed to generate xenografts. Besides lower absolute cell  
116 numbers and fewer genetic alterations (see below), microenvironmental dependence  
117 of early DCCs could account for these results. We therefore decided to retrieve  
118 candidate interactions of early DCCs with the microenvironment via direct molecular  
119 analysis of early DCCs from breast cancer patients and implement these results into  
120 surrogate *in vitro* models.

121

## 122 **Pathway activation in mammary stem and progenitor cells**

123 We hypothesized that stemness traits are necessary for the ability to survive and  
124 progress in a hostile environment and to initiate metastasis. Therefore, we tested for  
125 pathways activated in cells with progenitor or stem-like traits using our highly sensitive  
126 whole transcriptome amplification (WTA) method <sup>14, 19</sup>. To identify these cells, we  
127 labeled freshly isolated primary human mammary epithelial cells (HMECs) from  
128 reduction mammoplasties of healthy patients with the membrane dye PKH26. Labelled  
129 cells were then cultured under non-adherent mammosphere conditions, which support  
130 the expansion of stem/early progenitor cells and formation of multicellular spheroids of  
131 clonal origin with self-renewing capacity <sup>20</sup>. Cell divisions during mammosphere-  
132 formation diluted the dye until only few label-retaining cells (LRCs) were visible under  
133 the microscope (Fig. 2a). Isolating LRCs and non-LRCs (nLRCs) from disaggregated  
134 PKH26-labeled HMEC-spheres and plating them as single cell per well confirmed that  
135 the sphere-forming ability was solely confined to LRCs (Fig. 2b, Fisher's exact test  
136  $P=0.02$ ), which is consistent with previous findings <sup>21</sup>. For transcriptome analysis we  
137 isolated: (i) LRCs, (ii) nLRCs from disaggregated spheres and (iii) label-retaining cells  
138 that had not divided or formed spheres over time, but remained as single cells and  
139 were therefore termed quiescent single cells (QSCs). From each group we isolated  
140 single cells (LRC,  $n = 8$ ; nLRC,  $n = 5$ ; QSC,  $n = 10$ , Supplementary Table 1), performed  
141 WTA and microarray analysis as previously described <sup>19, 22</sup>. Bioinformatics analysis  
142 indicated most variable gene expression between LRCs and QSCs/nLRCs (Fig. 2c,  
143 Supplementary Table 2) and we found twelve pathways significantly enriched in LRCs  
144 over QSCs/nLRCs (Fig. 2d, Supplementary Table 2, 3).

145

## 146 **Identification of EpCAM-positive DCCs in bone marrow**

147 In order to test whether any of these pathways was enriched in DCCs isolated from  
148 BM of breast cancer patients, we aimed to isolate DCCs with confirmed malignant  
149 origin<sup>14</sup>. We followed the reasoning that epithelial cell identity in bone marrow plus the  
150 presence of genetic alterations is sufficient to claim malignant epithelial origin or  
151 malignant potential of a cell. DCCs were detected by screening diagnostic BM  
152 aspirates from 246 M0-stage and 18 M1-stage patients for cells that stained positively  
153 for the epithelial marker EpCAM (Supplementary Fig. 1a). Forty percent of M0-stage  
154 and 72% of M1-stage patients harbored EpCAM<sup>+</sup> cells. However, EpCAM is a surface  
155 marker that is not as specific for DCCs as the diagnostically used cytokeratins<sup>14</sup> in  
156 bone marrow because it is expressed by cells from the B cell lineage (own unpublished  
157 data and<sup>23</sup>). Therefore, we sought to differentiate between EpCAM-positive cells of  
158 breast cancer patients and non-cancer patients.

159 Copy number alterations (CNAs) are found in less than 5% of non-malignant cells with  
160 a median of 1.8%<sup>24-26</sup> and are diagnostically used to differentiate normal and  
161 malignant cells<sup>27</sup>. We therefore performed combined genome and transcriptome  
162 analysis and isolated genomic DNA and mRNA from the same single cell<sup>5, 14</sup>. Although  
163 this approach fails in 10-50%<sup>13, 14, 28</sup> and a CNA profile cannot be obtained for every  
164 cell, we found that 50% and 80% of successfully analyzed EpCAM-positive cells from  
165 M0 and M1 patients, respectively, harbored CNAs (Fig. 3a, Supplementary Fig. 1a).  
166 We selected these DCCs for single cell RNA-Seq analysis (M0: n=30 DCCs, 21  
167 patients; M1: n=11 DCCs, 5 patients). To provide additional evidence that the aberrant  
168 EpCAM-positive cells are derived from a non-hematopoietic cell lineage, we compared  
169 them with autochthonous EpCAM-positive bone marrow cells. The latter were isolated  
170 from patients without known malignant disease undergoing hip replacement surgery.

171 Of note, cancer patient-derived and non-cancer patient-derived EpCAM-positive cells  
172 could be clearly separated using the overall gene expression as well as epithelial and  
173 B-cell annotated genes – with the exception of one M0 cell, which was therefore  
174 excluded from further analysis (Fig. 3b). Moreover, many cells from M0-stage breast  
175 cancer patients strongly expressed the marker gene *KIT* (Fig. 3b), characteristic for  
176 mammary luminal progenitor cells <sup>29</sup> (see below). Together, copy number alterations  
177 and the epithelial, non-hematopoietic phenotype of cells isolated from patients with  
178 breast cancer provided compelling evidence that the selected cells were true DCCs.

### 179 **IL6 pathway activation in DCCs**

180 We then tested whether any of the pathways enriched in mammary stem cells (LRCs,  
181 Fig. 2d) were also enriched in DCCs using pathway membership enrichment analysis.  
182 We found four out of the twelve pathways to be significantly enriched in DCCs (Fig. 3c,  
183 d, Supplementary Table 4) including the pathway "IL6-mediated signaling events", the  
184 "TCPTP" pathway, the "VEGF-VEGFR3" and "Angiopoietin-Tie2 receptor" pathways.  
185 We decided to experimentally follow-up on the pathway "IL6-mediated signaling  
186 events" for several reasons: (i) IL6 signaling was previously found to be relevant for  
187 stemness maintenance, i.e. mammosphere-formation of ductal breast carcinoma and  
188 normal mammary gland <sup>30</sup>; (ii) the TCPTP pathway, a negative regulator of IL6  
189 signaling <sup>31</sup>, was also enriched and (iii) assessment of individual genes expressed in  
190 these pathways (Supplementary Fig. 1c) revealed substantial overlap of the four  
191 pathways (Fig. 3e, Supplementary Table 5), indicating that related signaling modules  
192 had been triggered. We also tested the expression of the extracellular signal receptors  
193 and found that neither the receptor VEGFR3 nor Tie2 were expressed by DCCs. In  
194 contrast, while the mRNA of *IL6RA* (the IL6 binding receptor unit) was also absent in  
195 DCCs, the IL6 signal transducing unit gp130 was expressed (*IL6ST*, Fig. 3d) indicating



196 amenability of DCCs to solely IL6 trans-signaling (see below) and thereby to  
197 microenvironmental control. Given the hints for a role of IL6 signaling for stemness  
198 maintenance and the restricted expression of IL6 signaling molecules, we decided to  
199 explore the activation of the IL6 pathway in normal and pre-malignant mammary cells  
200 in detail.

### 201 **IL6 trans-signaling activates sphere-forming ability**

202 The IL6 pathway can be activated directly or *in trans*. Direct or classical IL-6 signaling  
203 involves IL6 binding to the heterodimeric receptor consisting of the ubiquitously  
204 expressed signal transducing receptor subunit gp130 and the membrane-bound IL6  
205 receptor alpha chain CD126<sup>32</sup>. In contrast, trans-signaling does not involve the  
206 membranous IL6RA (mIL6RA), but binding of IL6 to the soluble IL6R alpha chain  
207 (sIL6RA) prior to binding to gp130 on the cell surface. sIL6RA can be generated by  
208 alternative splicing or limited proteolysis of the membrane-bound receptor and  
209 provided via autocrine and paracrine secretion. To explore the impact of the different  
210 modes of IL6 signaling on stemness or early progenitor traits, we used the pre-  
211 malignant human mammary epithelial cell lines MCF 10A and hTERT-HME1 and  
212 primary HMECs as models for early, genetically immature DCCs. Since metastasis  
213 founder cells are thought to display stem-like features<sup>33, 34</sup>, cells were cultured under  
214 mammosphere conditions. Analysis of expression and secretion of IL6 signaling  
215 molecules by MCF 10A and primary HMECs using ELISA, flow cytometry and single  
216 cell PCR of LRCs and nLRCs (Supplementary Fig. 2a-d) indicated that (i) membranous  
217 IL6RA is expressed only in a fraction of LRCs and nLRCs; (ii) expression of IL6  
218 signaling molecules (IL6RA, IL6, gp130) does not significantly differ between LRCs  
219 and nLRCs, (iii) co-expression of all signaling molecules in individual cells is extremely  
220 rare and (iv) the soluble form of IL6RA (sIL6RA) is generated by shedding of mIL6RA

221 and not by splicing. Therefore, and in line with our results for breast cancer DCCs, IL6  
222 trans-signaling via binding of IL6 to sIL6RA complexes to gp130 is much more likely  
223 involved in pathway activation than classical IL6 signaling. We therefore asked if  
224 stemness or early progenitor traits in mammary epithelial cells or DCCs are activated  
225 by a paracrine mode via classical signaling or trans-signaling. As a model for  
226 endogenous trans-signaling activation, we identified normal mammary cell-derived  
227 hTERT-HME1 cells with a knock-in of constitutively active EGFR (hTERT-HME1-  
228 EGFR $\Delta$ 746-750)<sup>35</sup>. This genetic change resulted in significantly increased amounts of IL6  
229 trans-signaling components in the culture-supernatant (Supplementary Fig. 2e).

230 We then treated mammosphere cultures of MCF 10A, hTERT-HME1, hTERT-HME1-  
231 EGFR $\Delta$ 746-750 and primary HMECs with activators or inhibitors of both pathways: (i) an  
232 anti-IL6 antibody to inhibit IL6 classical and trans-signaling, (ii) IL6 to activate classical  
233 and trans-signaling and (iii) Hyper-IL6 (HIL6) to selectively activate trans-signaling.  
234 HIL6 is a fusion protein consisting of sIL6RA, a linker chain, and IL6 and is used as a  
235 molecular model of the IL6/sIL6RA complex<sup>36, 37</sup>. Adding IL6 or HIL6 to MCF 10A,  
236 hTERT-HME1 cells or HMEC cultures significantly increased sphere-formation (Fig.  
237 4a-c, Student's t-test  $P < 0.01$  or one-way ANOVA/Dunnett's test  $P < 0.0001$ ).  
238 Interestingly, primary HMECs responded only to HIL6, but not IL6 (Fig. 4c) indicating  
239 that (i) the increase in sphere-number was due to IL6 trans-signaling, (ii) spheres  
240 originated from cells without mL6RA expression and (iii) endogenous sIL6RA is a  
241 limiting factor (Supplementary Fig. 2c). Of note, hTERT-HME1-EGFR $\Delta$ 746-750 could only  
242 marginally be stimulated by addition of HIL6, suggesting that it added little to the  
243 already available IL6/sIL6RA complexes (Fig. 4d).

244 To dissect the impact of classical and trans-signaling on the observed increase  
245 in sphere-formation and hence the number of cells with stem-like activity, we

246 specifically inhibited IL6 trans-signaling, but not classical signaling by adding the  
247 soluble form of gp130 (sgp130-Fc) to IL6 stimulated MCF 10A sphere-cultures<sup>38, 39</sup>.  
248 At both concentrations of sgp130-Fc tested, IL6-induced sphere-formation was  
249 abolished (Fig. 4e; one-way ANOVA/Dunnett's test  $P < 0.0001$ ) demonstrating that cells  
250 devoid of membranous IL6RA accounted for the increase in sphere-numbers by  
251 acquiring or activating stem-like functions in response to IL6 trans-signaling.  
252 Consistently, blocking of endogenous classical and trans-signaling in hTERT-HME1-  
253 EGFR<sup>Δ746-750</sup> by anti-IL6, did not reduce sphere-formation to a greater extent than  
254 blocking IL6 trans-signaling only (Fig. 4f, one-way ANOVA/Dunnett's test  $P < 0.05$  and  
255  $< 0.01$ ).

#### 256 **IL6 trans-signaling converts progenitor into stem-like cells**

257 We noted that IL6- and HIL6-stimulated mammosphere-cultures showed an increase  
258 in the relative abundance of CD44<sup>high</sup>/CD24<sup>low</sup> cells (Fig. 5a, b), a phenotype that has  
259 been ascribed to neoplastic and non-tumorigenic mammary cells enriched in tumor-  
260 initiating and sphere-forming cells, respectively<sup>33, 40</sup>. Here, HIL6-stimulated cultures  
261 displayed the highest increase (Fig. 5a, b; one-way ANOVA/Dunnett's test ctrl. vs. IL6  
262 +/- sgp130-Fc,  $P < 0.01$ ; ctrl. vs. HIL6,  $P < 0.0001$ ). The increase in CD44<sup>high</sup>/CD24<sup>low</sup>  
263 cells was not the result of increased proliferation of any CD24/CD44 subpopulation,  
264 but seemed to be caused by conversion of non-stem-like CD44<sup>high</sup>/CD24<sup>high/int</sup> into  
265 CD44<sup>high</sup>/CD24<sup>low</sup> stem-like cells (Supplementary Fig. 3a-c). To corroborate these  
266 findings, we compared IL6/HIL6-induced differential gene expression in MCF 10A cells  
267 to differences in gene expression between mammary stem cell enriched (MaSC),  
268 luminal progenitor (LumProg) and mature luminal (MatLum) cells as published by Lim  
269 et al.<sup>41</sup>. The overlap between the respective differentially expressed genes was highly  
270 significant in almost all comparisons (Fig. 5c, Supplementary Fig. 3d, Supplementary

271 Table 6) and the observed expression fold changes were consistent with the notion  
272 that IL6/HIL6 stimulation recruits progenitor populations from both, more differentiated  
273 as well as more stem-like populations, with the de-differentiation branch (MatLum →  
274 LumProg) being more consistent than differentiation (MaSC → LumProg). It should be  
275 noted that these *in vitro* generated data are fully consistent with the strong expression  
276 of the luminal progenitor marker *KIT* in DCCs (Fig. 3b) that we found to be activated  
277 via IL6 signaling.

278 To confirm these findings, we tested if *ex vivo* derived primary HMECs converted to  
279 stem-like cells by HIL6 activation. We isolated nLRCs from non-IL6-stimulated HMEC-  
280 mammospheres (Supplementary Fig. 3e) and re-plated them as single cell per well  
281 with or without HIL6. Whereas in the absence of HIL6 nLRCs were unable to form  
282 spheres, the proportion of sphere-forming cells induced from nLRCs in the presence  
283 of HIL6 was similar to that of non-HIL6 stimulated LRCs (3 % vs. 5 % sphere-formation  
284 see Fig. 5d and 2b). Moreover, replacing HIL6 by IL6 in the first or second week of a  
285 two-week mammosphere assay showed that continuous IL6 trans-signaling is needed  
286 to induce and maintain the number of cells with stem-like activity (Supplementary Fig.  
287 3f). Finally, we confirmed that primary HIL6-treated HMEC spheres retain their ability  
288 to form acinar and tubular structures *in vitro* (Fig. 5e) and mammary ducts in  
289 immunodeficient NSG-mice (Fig. 5f). As MCF 10A cells do not form tumors in  
290 immunodeficient mice, we selected the luminal progenitor derived MDA-MB-231 cells  
291 to test whether the HIL6 induced increase in sphere-formation translates into higher  
292 malignancy *in vivo*. Like MCF 10A cells, MDA-MB-231 cells show increased sphere  
293 formation in response to HIL6 (Fig. 5g). Upon xenotransplantation of an equal number  
294 of MDA-MB-231 cells pre-treated with PBS, anti-IL6 or HIL6 for 3 hours, tumors in the  
295 HIL6-group were significantly larger than in the control group (Fig. 5h). This was not

296 caused by increased proliferation or decreased apoptosis as the percentage of Ki-67-  
297 positive tumor cells did not differ significantly between the groups (Fig. 5i), and  
298 caspase-3 positive cells were not detected in any of the tumors.

299

### 300 **Bone marrow niche cells regulate responsiveness to IL6 trans-signaling**

301 As gp130 expression is essential for IL6 signaling, we tested whether BM stromal cells  
302 modulate the ability of mammary epithelial cells to receive IL6 signals. We isolated  
303 primary human mesenchymal cells (MSCs) from diagnostic BM-aspirates of non-  
304 metastasized breast cancer patients or healthy volunteers and confirmed their ability  
305 to differentiate into adipocytes and osteoblasts *in vitro* (Fig. 6a, Supplementary Fig.  
306 4a). We then co-cultured MCF 10A cells with (i) MSCs, (ii) *in vitro* differentiated  
307 osteoblasts (OBs) or (iii) human umbilical vein endothelial cells (E4ORF1-HUVECs<sup>42</sup>)  
308 under non-sphere conditions. Interestingly, flow cytometric analysis revealed cell  
309 surface down-regulation of gp130 on MCF 10A cells co-cultured with MSCs and OBs,  
310 but not with HUVECs (Fig. 6b). Separation of MCF 10 A and MSCs by a transwell or  
311 using MSC-conditioned medium (CM) showed gp130 cell surface down-regulation to  
312 be independent from cell-cell contact (Supplementary Fig. 4b). Moreover, down-  
313 regulation was not immediate but observed between 6 and 14 hours after initiation of  
314 the co-culture with MSCs, OBs or MSC-conditioned medium from healthy donors or  
315 breast cancer patients (Fig. 6c, Supplementary Fig. 4c ). This kinetic is consistent with  
316 the known independency of gp130-internalization from ligand binding<sup>43</sup> and points  
317 towards a transcriptional regulation of gp130 surface expression. To test this, we  
318 determined gp130 gene expression levels in single cells isolated from MCF 10A/MSCs  
319 and MCF-7/MSC co-cultures. Interestingly, both cell lines decreased their gp130 gene  
320 expression in response to MSCs (Fig. 6d), which is consistent with transcriptional

321 regulation and demonstrates that early DCCs as well as more advanced cancer cells  
322 can respond to signals from neighboring cells.

323

324 To explore the functional impact of gp130 downregulation induced by MSCs, we tested  
325 MCF 10A cells pre-treated for 14 hrs with MSC-CM for their sphere-forming ability.  
326 Pre-treated MCF 10A showed a significant decrease in sphere-number and an  
327 increase in single, non-sphere forming cells in the presence of both, endogenously  
328 produced IL6/sIL6RA or exogenously added HIL6 (Fig. 6e, f, Student's t-test, both  
329  $P < 0.001$ ). The data indicate that the microenvironment in which early DCCs reside  
330 determines (i) their responsiveness to IL6 trans-signaling, with stromal and  
331 osteoblastic niches disabling IL6 trans-signaling in DCCs, and as a consequence (ii)  
332 the number of DCCs with stem-like phenotype and function, i.e. metastasis-initiating  
333 ability.

334

### 335 **Fully malignant DCCs escape IL6 trans-signaling dependence by oncogenic** 336 **pathway activation**

337 Cancer progression is driven by genetic and epigenetic evolution overriding  
338 microenvironmental control mechanisms. Although consensus about the nature of the  
339 metastatic niche is still lacking, MSC/OB-rich endosteal or vascular niches are believed  
340 to regulate the fate of DCCs<sup>42, 44</sup>. Our experiments indicate that endosteal niches,  
341 although being rich in IL6 and sIL6RA molecules<sup>45-48</sup>, render DCCs unresponsive to  
342 IL6 trans-signals. However, gp130<sup>+</sup> DCCs in vascular niches would respond to  
343 IL6/sIL6RA complexes. Therefore, in both niches pathway activation by mutation  
344 would provide a selection advantage for DCCs that otherwise might depend on  
345 microenvironmental signals. We consequently sought for corroborating evidence that

346 genetically variant DCCs may evade the need for IL6 trans-signaling and become  
347 selected. We considered the *PIK3CA* pathway a strong candidate for such a selected  
348 oncogenically activated pathway<sup>49</sup> as (i) IL6 signaling activates not only the JAK/STAT  
349 pathway, but also the PI3K/AKT pathway<sup>50</sup>, (ii) early DCCs expressed *PIK3CA* as core  
350 element of the four identified stemness-associated pathways (Fig. 3e), (iii) activating  
351 *PIK3CA* mutations in exons 9 and 20 are among the most frequent mutations occurring  
352 in human breast cancer and (iv) constitutive activation of the *PIK3CA* pathway has  
353 been shown to evoke cell de-differentiation of mammary gland cells into a multipotent  
354 stem-like state<sup>51</sup>. To test *PIK3CA*-signaling, we analyzed sphere-formation in  
355 response to HIL6 in pre-malignant MCF 10A and malignant breast cancer cell lines  
356 with or without a *PIK3CA* activating mutation. Interestingly, HIL6 increased sphere-  
357 formation only in cells with wildtype *PIK3CA* (Fig. 7a), but not in cells with an activating  
358 *PIK3CA*<sup>E545K/+</sup> mutation. Using isogenic MCF 10A cells with (knock-in of *PIK3CA*<sup>E545K/+</sup>)  
359 and without *PIK3CA* mutation, we noted that HIL6 activated the pSTAT3 pathway in  
360 mutant and wildtype cells (Fig. 7b, Supplementary Fig. 5). In contrast, IL6 trans-  
361 signaling induced a massive activation of the pERK and pAKT pathways only in  
362 wildtype cells as these pathways were already activated in PI3K-mutant cells (Fig. 7b).  
363 Consistently, untreated PI3K-mutant cells formed significantly more spheres than  
364 wildtype *PIK3CA* cells (Fig. 7c, Student's t-test, P<0.0001). MSC-induced gp130  
365 downregulation was unaffected by the *PIK3CA* mutational status (Supplementary Fig.  
366 4d). In summary, these data show that *PIK3CA* activation overrides regulation of  
367 stemness-traits by IL6 trans signaling and renders cancers cells more independent  
368 from microenvironment control.

369

370 Based on these findings, we tested for direct evidence of genetic selection in the  
371 *PIK3CA* pathway during cancer progression by analyzing the *PIK3CA* gene for

372 mutations in exon 9 and 20 in BM-derived DCCs from non-metastasized (M0-stage)  
373 and in circulating tumor cells (CTCs) from metastasized (M1-stage) breast cancer  
374 patients mostly displaying bone metastases. Both groups of cytokeratin-positive  
375 cancer cells had previously been shown to display CNAs<sup>5, 52</sup>. As hormone-receptor  
376 positive breast cancer is the most frequent breast cancer type, we focused on this  
377 disease type to obtain meaningful sample numbers. Consistent with previous data,  
378 *PIK3CA* hotspot mutations were found in DCCs/CTCs of patients with hormone  
379 receptor (HR)-positive tumors (Fig. 7d). Strikingly, only 4.2% of M0-stage DCCs  
380 harbored *PIK3CA* mutations, whereas manifest metastasis-derived cells from HR-  
381 positive tumors displayed them in 34.3% of cases (Fisher's exact test,  $P < 0.0001$ , Fig.  
382 7d). These data are fully consistent with a scenario in which early DCCs depend on  
383 IL6 trans-signaling and become increasingly independent thereof during cancer  
384 evolution.

385

386



## 387 **Discussion**

388 In this study we provide evidence for a role of the niche microenvironment to enable  
389 and drive the earliest stages of human metastasis formation. We identified IL6 trans-  
390 signaling as an activator of stem-like and progenitor traits underlying epithelial colony  
391 formation, a mechanism that is characterized by dependence on both IL6 and sIL6RA,  
392 in contrast to IL6 alone, when a cell is equipped with mL6RA. Our findings question  
393 the concept of fully-malignant and autonomous cancer cells as founders of metastasis.  
394 However, during subsequent malignant evolution DCCs may evade  
395 microenvironmental control by acquiring IL6-independence. Our data indicate that this  
396 could occur via mutational activation of the PI3K pathway.

397 Several observations characterize early metastatic bone marrow colonization.  
398 First, breast cancer dissemination in humans often starts from lesions often measuring  
399 less than 1-4 mm in diameter<sup>2, 5</sup>. Second, initially DCCs often do not display the typical  
400 karyotypic changes of breast cancer tumors or metastases, however are detected long  
401 before manifestation of clinical metastasis<sup>5, 8, 15</sup>. Third, metastasis formation in BM  
402 usually takes years to decades<sup>53</sup> indicating that evolutionary mechanisms and slow  
403 growth kinetics dictate the pace. This framework precludes the use of transgenic  
404 mouse models that are too short-lived to mimic the process in patients and rarely form  
405 bone metastases. The same applies to *in vitro* and *in vivo* studies involving commonly  
406 used and genomically highly aberrant breast cancer cell lines derived from manifest  
407 metastases or primary tumors. All of these do not represent the biology under  
408 investigation.

409 We therefore aimed at expanding early DCCs in immune-deficient mice, but  
410 failed. Reasons for this can be manifold: DCCs are extremely rare and we estimate  
411 that often less than 10 cells/mouse were injected. Also, species barriers may preclude  
412 engraftment of cancer cells that may critically depend on certain microenvironmental

413 signals, among them the species specific IL6 signaling<sup>54</sup>. Our failure is also consistent  
414 with data from melanoma where we had identified that engraftment of DCCs requires  
415 activation of specific oncogenic pathways<sup>55</sup> - which in case of *PIK3CA* mutations early  
416 (M0-stage) breast cancer DCCs commonly lack. Consistently, M1-stage DCCs formed  
417 xenografts in two out of four cases. We therefore based our approach on two starting  
418 points: First, we analyzed transcriptomic data of early human breast cancer DCCs to  
419 identify candidate pathways and second, we used genomically close-to-normal and  
420 normal mammary epithelial cells as models to functionally interrogate the  
421 transcriptome data.

422 We focused our analysis on EpCAM-positive cells from bone marrow. Currently,  
423 EpCAM is the best marker to identify and isolate viable epithelial cells from bone  
424 marrow. However, it is neither fully specific<sup>14</sup> as cells of the B cell lineage may express  
425 EpCAM<sup>23</sup> nor does it identify all breast cancer initiating cells<sup>56</sup>. However, EpCAM-  
426 positive mammary progenitor cells give rise to chromosomally instable cancers, such  
427 as triple negative basal like / post-EMT and hormone receptor positive cancers<sup>57</sup>.  
428 Since we used chromosomal instability as inclusion criterion to identify DCCs our  
429 findings do not apply to claudin-low cancers which are derived from EpCAM-negative,  
430 chromosomally stable cells. Interestingly, early M0-stage DCCs isolated from bone  
431 marrow highly expressed *KIT*, which is characteristic for luminal progenitor cells.  
432 Luminal progenitor cells are the last common precursor of triple negative, basal-like  
433 and hormone receptor positive cancers<sup>58</sup>. Since hormone-receptor positive breast  
434 cancers can experimentally be “normalized” by functionally impairing their luminal  
435 progenitor cells<sup>59</sup>, cells with this phenotype are likely to comprise metastasis founder  
436 cells of EpCAM-positive triple negative and hormone-receptor positive cancers.

437 This reasoning is fully consistent with our observed effects of IL6 on normal  
438 mammary stem and progenitor cells. We identified an activated IL6 pathway in DCCs

439 and our *in vitro* models revealed that IL6 trans-, but not classical signaling, induces de-  
440 differentiation of mammary epithelial cells and endows them with stemness and  
441 progenitor traits. IL6 trans-signaling makes cells dependent on the microenvironment,  
442 however, BM represents an IL6 rich environment<sup>47</sup>. There, IL6/sIL6RA is important for  
443 regulation of hematopoiesis<sup>60</sup> and for generation of hematopoiesis-supporting BM  
444 stromal cells<sup>61</sup> using autocrine/paracrine feedback loops<sup>48</sup>. In the context of breast  
445 cancer, it is noteworthy that serum levels of IL6 and sIL6R and their local production  
446 in BM by osteoblasts depend on sex-steroids, change with menstrual cycle, are  
447 negatively regulated by estrogen and hormone replacement therapy and increase up  
448 to tenfold during menopause<sup>48,62,63</sup>. Therefore, systemic microenvironmental changes  
449 may provide a mechanism by which DCCs become activated in post-menopausal  
450 breast cancer patients. Consistently, bone-only metastasis is significantly associated  
451 with higher age at primary diagnosis in HR-positive breast cancer patients<sup>64</sup>, known  
452 for very late relapses.

453 We show that IL6 trans-signaling equips normal and transformed mammary cells with  
454 stemness and progenitor traits likely to be crucial for DCCs. Although about 6,000 –  
455 27,000 DCCs may lodge in the BM compartment<sup>65</sup>, only few of them will progress to  
456 manifest metastasis. Our data are in line with this observation as co-culture with BM  
457 niche cells like osteoblasts or stromal MSCs resulted in loss of gp130 expression  
458 rendering only DCCs in vascular niches possibly responsive to IL6 trans-signaling.  
459 Moreover, only about 3-5% of mammary cells acquired mammosphere-formation  
460 ability upon HIL6 stimulation. Genetic analysis of DCCs revealed that DCCs from HR<sup>+</sup>  
461 breast cancer progressing to manifest metastasis often acquired *PIK3CA* mutations,  
462 possibly because the activated PI3K/AKT pathway rendered mammary epithelial cells  
463 independent from IL6 trans-signaling.

464           We are aware of data indicating that some metastases may be derived from  
465 late-disseminating cells <sup>66, 67</sup>. One study showed that in 3 out of 6 cases tested  
466 cytokeratin-positive cells displayed alteration profiles very similar to their matched  
467 primary tumors <sup>66</sup>. Future studies will need to carefully address the role of tumor  
468 (sub)type, disease stage and duration, growth kinetics and a possible interdependence  
469 of early and late DCCs for metastasis formation. However, the findings presented here  
470 demonstrate that early DCCs are able to interpret signals from the bone marrow  
471 environment that activate them and might drive their progression. Thereby, our study  
472 may lay the groundwork for novel adjuvant therapies. Early DCCs striving to form  
473 metastasis during yearlong evolutionary processes may be sensitive to different drugs  
474 than fully malignant cancer cells. Their Achilles' heel may consist of  
475 microenvironmental signals supporting their survival and genomic progression. Since  
476 there is hope that oncogene- or tumor-suppressor-gene-associated drug-resistance  
477 mechanisms are not yet operative, depriving early DCCs of microenvironmental  
478 support pathways could render them vulnerable to non-genotoxic drugs.

479 **Acknowledgements**

480 We thank Irene Nebeja, Irina Hartmann, Michaela Becker and Silvia Materna-Reichelt  
481 for excellent technical assistance. We are grateful to Alberto Bardelli for hTERT-HME1  
482 cell lines and Cyrus Ghajar for E4ORF1 HUVECs. This work was supported by grants  
483 to CAK from the Deutsche Krebshilfe (TransLUMINAL-B 111536), the Dr Josef Steiner  
484 foundation, the ERC (grant 322602), the Bavarian ministry of economic affairs, energy  
485 and technology (AZ 20-3410.1-1-1), the Deutsche Forschungsgemeinschaft (DFG; KL  
486 1233/10-2) and the Bavarian Research Foundation (Bayerische Forschungstiftung,  
487 DOK-165-13). The work of MW-K has been funded by the DFG (WE 4632/1-1, WE  
488 4632-4/1 and WE 4632/5-1 within the FOR2127). TissueFAX was supported by the  
489 DFG (INST 89/341-1 FUGG). The work of SR-J has been funded by grants from DFG  
490 in the SFB841 (project C1), the SFB 877 (projects A1 and A14), by the Deutsche  
491 Krebshilfe and by the German-Israeli Foundation for Scientific Research and  
492 Development.

493

494 **Authors' Contributions**

495 **Conception and design:** C. A. Klein and M. Werner-Klein

496 **Development of methodology:** M. Werner-Klein, A. Grujovic, M. Obradovic, M.  
497 Hoffmann, S. Kirsch, S. Treitschke, J. Warfsmann, K. Honarnejad, S. Rose-John

498 **Acquisition of data:** M. Werner-Klein, A. Grujovic, C. Irlbeck, M. Obradovic, S.  
499 Treitschke, C. Köstler, C. Botteron, K. Weidele, C. Werno, S. Kirsch, M. Guzvic, K.  
500 Honarnejad, I. Blochberger, S. Grunewald, E. Schneider, G. Haunschild, N. Patwary,  
501 S. Guetter, S. Huber, S. Bucholz, P. Rümmele, N. Heine

502 **Analysis and interpretation of data:** M. Werner-Klein, A. Grujovic, M. Hoffmann, X.  
503 Lu, H. Koerke-Qu, B. Polzer, J. Warfsmann, K. Honarnejad, Z. Czyz, C. A. Klein

504 **Writing, of the manuscript:** M. Werner-Klein, M. Hoffmann and C. A. Klein

505 **Review and/or revision of the manuscript:** all authors

506 **Competing interest:** The authors declare no potential conflicts of interest.

507 **References**

- 508 1. Engel, J. *et al.* The process of metastatisation for breast cancer. *European journal of*  
509 *cancer* **39**, 1794-1806 (2003).
- 510 2. Klein, C.A. Parallel progression of primary tumours and metastases. *Nature reviews.*  
511 *Cancer* **9**, 302-312 (2009).
- 512 3. Klein, C.A. Framework models of tumor dormancy from patient-derived observations.  
513 *Curr Opin Genet Dev* **21**, 42-49 (2011).
- 514 4. Harper, K.L. *et al.* Mechanism of early dissemination and metastasis in Her2(+)   
515 mammary cancer. *Nature* **540**, 588-592 (2016).
- 516 5. Hosseini, H. *et al.* Early dissemination seeds metastasis in breast cancer. *Nature* **540**,  
517 552-558 (2016).
- 518 6. Husemann, Y. *et al.* Systemic spread is an early step in breast cancer. *Cancer cell* **13**,  
519 58-68 (2008).
- 520 7. Weedon-Fekjaer, H., Lindqvist, B.H., Vatten, L.J., Aalen, O.O. & Tretli, S. Breast  
521 cancer tumor growth estimated through mammography screening data. *Breast cancer*  
522 *research : BCR* **10**, R41 (2008).
- 523 8. Schmidt-Kittler, O. *et al.* From latent disseminated cells to overt metastasis: genetic  
524 analysis of systemic breast cancer progression. *Proceedings of the National Academy*  
525 *of Sciences of the United States of America* **100**, 7737-7742 (2003).
- 526 9. Werner-Klein, M. *et al.* Genetic alterations driving metastatic colony formation are  
527 acquired outside of the primary tumour in melanoma. *Nat Commun* **9**, 595 (2018).
- 528 10. Braun, S. *et al.* A pooled analysis of bone marrow micrometastasis in breast cancer. *The*  
529 *New England journal of medicine* **353**, 793-802 (2005).
- 530 11. Riethdorf, S., Wikman, H. & Pantel, K. Review: Biological relevance of disseminated  
531 tumor cells in cancer patients. *International journal of cancer. Journal international du*  
532 *cancer* **123**, 1991-2006 (2008).
- 533 12. Pantel, K. & Brakenhoff, R.H. Dissecting the metastatic cascade. *Nature reviews.*  
534 *Cancer* **4**, 448-456 (2004).
- 535 13. Guzvic, M. *et al.* Combined genome and transcriptome analysis of single disseminated  
536 cancer cells from bone marrow of prostate cancer patients reveals unexpected  
537 transcriptomes. *Cancer research* **74**, 7383-7394 (2014).
- 538 14. Klein, C.A. *et al.* Combined transcriptome and genome analysis of single  
539 micrometastatic cells. *Nature biotechnology* **20**, 387-392 (2002).
- 540 15. Schardt, J.A. *et al.* Genomic analysis of single cytokeratin-positive cells from bone  
541 marrow reveals early mutational events in breast cancer. *Cancer cell* **8**, 227-239 (2005).
- 542 16. Pantel, K. *et al.* Establishment of micrometastatic carcinoma cell lines: a novel source  
543 of tumor cell vaccines. *Journal of the National Cancer Institute* **87**, 1162-1168 (1995).
- 544 17. Hosch, S. *et al.* Malignant potential and cytogenetic characteristics of occult  
545 disseminated tumor cells in esophageal cancer. *Cancer research* **60**, 6836-6840 (2000).
- 546 18. O'Sullivan G, C. *et al.* Micrometastases in esophagogastric cancer: high detection rate  
547 in resected rib segments. *Gastroenterology* **116**, 543-548 (1999).
- 548 19. Hartmann, C.H. & Klein, C.A. Gene expression profiling of single cells on large-scale  
549 oligonucleotide arrays. *Nucleic acids research* **34**, e143 (2006).
- 550 20. Dontu, G. *et al.* In vitro propagation and transcriptional profiling of human mammary  
551 stem/progenitor cells. *Genes Dev* **17**, 1253-1270 (2003).
- 552 21. Pece, S. *et al.* Biological and molecular heterogeneity of breast cancers correlates with  
553 their cancer stem cell content. *Cell* **140**, 62-73 (2010).
- 554 22. Suzuki, T. *et al.* Mice produced by mitotic reprogramming of sperm injected into  
555 haploid parthenogenotes. *Nat Commun* **7**, 12676 (2016).

- 556 23. Cackowski, F.C. *et al.* Detection and isolation of disseminated tumor cells in bone  
557 marrow of patients with clinically localized prostate cancer. *Prostate* **79**, 1715-1727  
558 (2019).
- 559 24. Jakubek, Y.A. *et al.* Large-scale analysis of acquired chromosomal alterations in non-  
560 tumor samples from patients with cancer. *Nature biotechnology* **38**, 90-96 (2020).
- 561 25. Loh, P.R. *et al.* Insights into clonal haematopoiesis from 8,342 mosaic chromosomal  
562 alterations. *Nature* **559**, 350-355 (2018).
- 563 26. Vattathil, S. & Scheet, P. Extensive Hidden Genomic Mosaicism Revealed in Normal  
564 Tissue. *Am J Hum Genet* **98**, 571-578 (2016).
- 565 27. Bauer, J. & Bastian, B.C. Distinguishing melanocytic nevi from melanoma by DNA  
566 copy number changes: comparative genomic hybridization as a research and diagnostic  
567 tool. *Dermatol Ther* **19**, 40-49 (2006).
- 568 28. Klein, C.A. *et al.* The hematopoietic system-specific minor histocompatibility antigen  
569 HA-1 shows aberrant expression in epithelial cancer cells. *The Journal of experimental*  
570 *medicine* **196**, 359-368 (2002).
- 571 29. Lim, E. *et al.* Aberrant luminal progenitors as the candidate target population for basal  
572 tumor development in BRCA1 mutation carriers. *Nature medicine* **15**, 907-913 (2009).
- 573 30. Sansone, P. *et al.* IL-6 triggers malignant features in mammospheres from human ductal  
574 breast carcinoma and normal mammary gland. *The Journal of clinical investigation* **117**,  
575 3988-4002 (2007).
- 576 31. Schaper, F. & Rose-John, S. Interleukin-6: Biology, signaling and strategies of  
577 blockade. *Cytokine Growth Factor Rev* **26**, 475-487 (2015).
- 578 32. Scheller, J., Chalaris, A., Schmidt-Arras, D. & Rose-John, S. The pro- and anti-  
579 inflammatory properties of the cytokine interleukin-6. *Biochimica et biophysica acta*  
580 **1813**, 878-888 (2011).
- 581 33. Al-Hajj, M., Wicha, M.S., Benito-Hernandez, A., Morrison, S.J. & Clarke, M.F.  
582 Prospective identification of tumorigenic breast cancer cells. *Proceedings of the*  
583 *National Academy of Sciences of the United States of America* **100**, 3983-3988 (2003).
- 584 34. Ginestier, C. *et al.* ALDH1 is a marker of normal and malignant human mammary stem  
585 cells and a predictor of poor clinical outcome. *Cell Stem Cell* **1**, 555-567 (2007).
- 586 35. Di Nicolantonio, F. *et al.* Replacement of normal with mutant alleles in the genome of  
587 normal human cells unveils mutation-specific drug responses. *Proceedings of the*  
588 *National Academy of Sciences of the United States of America* **105**, 20864-20869  
589 (2008).
- 590 36. Rose-John, S. IL-6 trans-signaling via the soluble IL-6 receptor: importance for the pro-  
591 inflammatory activities of IL-6. *Int J Biol Sci* **8**, 1237-1247 (2012).
- 592 37. Fischer, M. *et al.* I. A bioactive designer cytokine for human hematopoietic progenitor  
593 cell expansion. *Nature biotechnology* **15**, 142-145 (1997).
- 594 38. Jostock, T. *et al.* Soluble gp130 is the natural inhibitor of soluble interleukin-6 receptor  
595 transsignaling responses. *Eur J Biochem* **268**, 160-167 (2001).
- 596 39. Scheller, J., Schuster, B., Holscher, C., Yoshimoto, T. & Rose-John, S. No inhibition of  
597 IL-27 signaling by soluble gp130. *Biochem Biophys Res Commun* **326**, 724-728 (2005).
- 598 40. Mani, S.A. *et al.* The epithelial-mesenchymal transition generates cells with properties  
599 of stem cells. *Cell* **133**, 704-715 (2008).
- 600 41. Lim, E. *et al.* Transcriptome analyses of mouse and human mammary cell  
601 subpopulations reveal multiple conserved genes and pathways. *Breast cancer research*  
602 *: BCR* **12**, R21 (2010).
- 603 42. Ghajar, C.M. *et al.* The perivascular niche regulates breast tumour dormancy. *Nat Cell*  
604 *Biol* **15**, 807-817 (2013).
- 605 43. Thiel, S. *et al.* Constitutive internalization and association with adaptor protein-2 of the  
606 interleukin-6 signal transducer gp130. *FEBS Lett* **441**, 231-234 (1998).



- 607 44. Shiozawa, Y. *et al.* Human prostate cancer metastases target the hematopoietic stem cell  
608 niche to establish footholds in mouse bone marrow. *The Journal of clinical investigation*  
609 **121**, 1298-1312 (2011).
- 610 45. Xie, Z. *et al.* Interleukin-6/interleukin-6 receptor complex promotes osteogenic  
611 differentiation of bone marrow-derived mesenchymal stem cells. *Stem Cell Res Ther* **9**,  
612 13 (2018).
- 613 46. Vermes, C. *et al.* Shedding of the interleukin-6 (IL-6) receptor (gp80) determines the  
614 ability of IL-6 to induce gp130 phosphorylation in human osteoblasts. *J Biol Chem* **277**,  
615 16879-16887 (2002).
- 616 47. Erices, A., Conget, P., Rojas, C. & Minguell, J.J. Gp130 activation by soluble  
617 interleukin-6 receptor/interleukin-6 enhances osteoblastic differentiation of human  
618 bone marrow-derived mesenchymal stem cells. *Experimental cell research* **280**, 24-32  
619 (2002).
- 620 48. Girasole, G., Giuliani, N., Modena, A.B., Passeri, G. & Pedrazzoni, M. Oestrogens  
621 prevent the increase of human serum soluble interleukin-6 receptor induced by  
622 ovariectomy in vivo and decrease its release in human osteoblastic cells in vitro. *Clin*  
623 *Endocrinol (Oxf)* **51**, 801-807 (1999).
- 624 49. Schafer, Z.T. & Brugge, J.S. IL-6 involvement in epithelial cancers. *The Journal of*  
625 *clinical investigation* **117**, 3660-3663 (2007).
- 626 50. Heinrich, P.C. *et al.* Principles of interleukin (IL)-6-type cytokine signalling and its  
627 regulation. *Biochem J* **374**, 1-20 (2003).
- 628 51. Koren, S. *et al.* PIK3CA(H1047R) induces multipotency and multi-lineage mammary  
629 tumours. *Nature* **525**, 114-118 (2015).
- 630 52. Polzer, B. *et al.* Molecular profiling of single circulating tumor cells with diagnostic  
631 intention. *EMBO molecular medicine* **6**, 1371-1386 (2014).
- 632 53. Kennecke, H. *et al.* Metastatic behavior of breast cancer subtypes. *Journal of clinical*  
633 *oncology : official journal of the American Society of Clinical Oncology* **28**, 3271-3277  
634 (2010).
- 635 54. Peters, M. *et al.* The function of the soluble interleukin 6 (IL-6) receptor in vivo:  
636 sensitization of human soluble IL-6 receptor transgenic mice towards IL-6 and  
637 prolongation of the plasma half-life of IL-6. *The Journal of experimental medicine* **183**,  
638 1399-1406 (1996).
- 639 55. Werner-Klein, M. *et al.* Immune humanization of immunodeficient mice using  
640 diagnostic bone marrow aspirates from carcinoma patients. *PloS one* **9**, e97860 (2014).
- 641 56. Keller, P.J. *et al.* Defining the cellular precursors to human breast cancer. *Proceedings*  
642 *of the National Academy of Sciences of the United States of America* **109**, 2772-2777  
643 (2012).
- 644 57. Morel, A.P. *et al.* A stemness-related ZEB1-MSRB3 axis governs cellular pliancy and  
645 breast cancer genome stability. *Nature medicine* **23**, 568-578 (2017).
- 646 58. Fu, N.Y., Nolan, E., Lindeman, G.J. & Visvader, J.E. Stem Cells and the Differentiation  
647 Hierarchy in Mammary Gland Development. *Physiol Rev* **100**, 489-523 (2020).
- 648 59. Abu-Tayeh, H. *et al.* 'Normalizing' the malignant phenotype of luminal breast cancer  
649 cells via alpha(v)beta(3)-integrin. *Cell Death Dis* **7**, e2491 (2016).
- 650 60. Bernad, A. *et al.* Interleukin-6 is required in vivo for the regulation of stem cells and  
651 committed progenitors of the hematopoietic system. *Immunity* **1**, 725-731 (1994).
- 652 61. Rodriguez Mdel, C., Bernad, A. & Aracil, M. Interleukin-6 deficiency affects bone  
653 marrow stromal precursors, resulting in defective hematopoietic support. *Blood* **103**,  
654 3349-3354 (2004).
- 655 62. Abrahamsen, B., Bonnevie-Nielsen, V., Ebbesen, E.N., Gram, J. & Beck-Nielsen, H.  
656 Cytokines and bone loss in a 5-year longitudinal study--hormone replacement therapy  
657 suppresses serum soluble interleukin-6 receptor and increases interleukin-1-receptor

- 658 antagonist: the Danish Osteoporosis Prevention Study. *J Bone Miner Res* **15**, 1545-1554  
659 (2000).
- 660 63. Giuliani, N. *et al.* Serum interleukin-6, soluble interleukin-6 receptor and soluble gp130  
661 exhibit different patterns of age- and menopause-related changes. *Exp Gerontol* **36**, 547-  
662 557 (2001).
- 663 64. Diessner, J. *et al.* Evaluation of clinical parameters influencing the development of bone  
664 metastasis in breast cancer. *BMC cancer* **16**, 307 (2016).
- 665 65. Klein, C.A. & Holzel, D. Systemic cancer progression and tumor dormancy:  
666 mathematical models meet single cell genomics. *Cell cycle* **5**, 1788-1798 (2006).
- 667 66. Demeulemeester, J. *et al.* Tracing the origin of disseminated tumor cells in breast cancer  
668 using single-cell sequencing. *Genome Biol* **17**, 250 (2016).
- 669 67. Yates, L.R. *et al.* Genomic Evolution of Breast Cancer Metastasis and Relapse. *Cancer*  
670 *cell* **32**, 169-184 e167 (2017).
- 671 68. Fehm, T. *et al.* HER2 status of circulating tumor cells in patients with metastatic breast  
672 cancer: a prospective, multicenter trial. *Breast cancer research and treatment* **124**, 403-  
673 412 (2010).
- 674 69. Riethdorf, S. *et al.* Detection of circulating tumor cells in peripheral blood of patients  
675 with metastatic breast cancer: a validation study of the CellSearch system. *Clinical*  
676 *cancer research : an official journal of the American Association for Cancer Research*  
677 **13**, 920-928 (2007).
- 678 70. Soule, H.D. *et al.* Isolation and characterization of a spontaneously immortalized human  
679 breast epithelial cell line, MCF-10. *Cancer research* **50**, 6075-6086 (1990).
- 680 71. Delorme, B. & Charbord, P. Culture and characterization of human bone marrow  
681 mesenchymal stem cells. *Methods Mol Med* **140**, 67-81 (2007).
- 682 72. Klein, C.A. *et al.* Genetic heterogeneity of single disseminated tumour cells in minimal  
683 residual cancer. *Lancet* **360**, 683-689 (2002).
- 684 73. Klein, C.A. *et al.* Comparative genomic hybridization, loss of heterozygosity, and DNA  
685 sequence analysis of single cells. *Proceedings of the National Academy of Sciences of*  
686 *the United States of America* **96**, 4494-4499 (1999).
- 687 74. Durst, F.C. *et al.* Targeted transcript quantification in single disseminated cancer cells  
688 after whole transcriptome amplification. *PloS one* **14**, e0216442 (2019).
- 689 75. Ritchie, M.E. *et al.* limma powers differential expression analyses for RNA-sequencing  
690 and microarray studies. *Nucleic acids research* **43**, e47 (2015).
- 691 76. Ritchie, M.E. *et al.* Empirical array quality weights in the analysis of microarray data.  
692 *BMC Bioinformatics* **7**, 261 (2006).
- 693 77. Altschul, S.F., Gish, W., Miller, W., Myers, E.W. & Lipman, D.J. Basic local alignment  
694 search tool. *Journal of molecular biology* **215**, 403-410 (1990).
- 695 78. Zerbino, D.R. *et al.* Ensembl 2018. *Nucleic acids research* **46**, D754-D761 (2018).
- 696 79. Frankish, A. *et al.* GENCODE reference annotation for the human and mouse genomes.  
697 *Nucleic acids research* **47**, D766-D773 (2019).
- 698 80. Team, R.C. R: A language and environment for statistical computing. [https://www.R-](https://www.R-project.org)  
699 [project.org](https://www.R-project.org) (2017).
- 700 81. Mangiafico, S.S. Summary and Analysis of Extension Program Evaluation in R, version  
701 1.18.1. (2016).
- 702 82. van der Maaten, L.H.G. Visualizing Data using t-SNe. *Journal of Machine Learning*  
703 *Research* **9**, 2579 - 2605 (2008).
- 704 83. Schaefer, C.F. *et al.* PID: the Pathway Interaction Database. *Nucleic acids research* **37**,  
705 D674-679 (2009).
- 706 84. Kuleshov, M.V. *et al.* Enrichr: a comprehensive gene set enrichment analysis web  
707 server 2016 update. *Nucleic acids research* **44**, W90-97 (2016).

- 708 85. Bioinformatics, B. FastQC.  
709 <https://www.bioinformatics.babraham.ac.uk/projects/fastqc> (2019).  
710 86. Ewels, P., Magnusson, M., Lundin, S. & Kaller, M. MultiQC: summarize analysis  
711 results for multiple tools and samples in a single report. *Bioinformatics* **32**, 3047-3048  
712 (2016).  
713 87. DataScience, J. <https://jgi.doe.gov/data-and-tools/bb-tools> (2019).  
714 88. Chu, J. *et al.* BioBloom tools: fast, accurate and memory-efficient host species sequence  
715 screening using bloom filters. *Bioinformatics* **30**, 3402-3404 (2014).  
716 89. Dobin, A. *et al.* STAR: ultrafast universal RNA-seq aligner. *Bioinformatics* **29**, 15-21  
717 (2013).  
718 90. Liao, Y., Smyth, G.K. & Shi, W. The Subread aligner: fast, accurate and scalable read  
719 mapping by seed-and-vote. *Nucleic acids research* **41**, e108 (2013).  
720 91. McCarthy, D.J., Campbell, K.R., Lun, A.T. & Wills, Q.F. Scater: pre-processing,  
721 quality control, normalization and visualization of single-cell RNA-seq data in R.  
722 *Bioinformatics* **33**, 1179-1186 (2017).  
723 92. Haghverdi, L., Lun, A.T.L., Morgan, M.D. & Marioni, J.C. Batch effects in single-cell  
724 RNA-sequencing data are corrected by matching mutual nearest neighbors. *Nature*  
725 *biotechnology* **36**, 421-427 (2018).  
726 93. database, U. Goldenpath. <http://hgdownload.cse.ucsc.edu/goldenpath/hg38/database>  
727 (2019).  
728 94. ISCN ISCN rules for listing chromosomal rearrangements. *Curr Protoc Hum Genet*  
729 **Appendix 4**, Appendix 4C (2001).  
730 95. Baudis, M. & Cleary, M.L. Progenetix.net: an online repository for molecular  
731 cytogenetic aberration data. *Bioinformatics* **17**, 1228-1229 (2001).  
732

## 733 **Methods**

### 734 **Patient material**

735 Human non-cancerous mammary tissue was obtained from female patients  
736 undergoing reduction mammoplasty surgeries at the University Center of Plastic-,  
737 Aesthetic, Hand- and Reconstructive Surgery, University of Regensburg, Germany  
738 after informed, written consent of patients was obtained (ethics vote number 07/043,  
739 ethics committee of the University Regensburg). After verification of the non-cancerous  
740 origin of the tissue by a pathologist, mammary glands were dissociated and primary  
741 human mammary epithelial cells (HMECs) isolated.

742 Human disseminated cancer cells were obtained from BM-aspirates of breast or  
743 prostate cancer patients without and with distant metastases. EpCAM+ cells were  
744 obtained from bone marrow of patients without known malignant disease undergoing  
745 hip replacement surgery. Human mesenchymal stem cells were obtained from BM-

746 aspirates of breast cancer patients or healthy donors. Written informed consent of  
747 cancer and control patients was obtained and the ethics committee of the University of  
748 Regensburg (ethics vote number 07/79) approved BM-sampling and analysis of  
749 isolated cells.

750 Enrichment and detection of CTCs was performed within the SUCCESS (EUDRA-CT  
751 number 2005-000490-21) and DETECT (EUDRA-CT number 2010-024238-46) <sup>68</sup>  
752 studies using the CellSearch® system <sup>69</sup>. Written informed consent for CTC analysis  
753 and characterization was obtained for all patients included. All experiments conformed  
754 to the principles set out in the WMA Declaration of Helsinki and were approved by the  
755 ethical committees responsible for the corresponding studies (Universities of Munich,  
756 Dusseldorf, Tuebingen, and Ulm). Isolation and molecular analysis of CTCs was  
757 approved by the ethics committee of Regensburg (ethics vote number 07/079).

758

### 759 **Mice**

760 NOD.Cg-Prkdc<sup>scid</sup> IL2rg<sup>tmWjl</sup>/Sz (also termed NSG) or NOD.Cg-Prkdc<sup>scid</sup> mice were  
761 purchased from the Jackson Laboratory, USA and maintained under specific-pathogen  
762 free conditions, with acidified water and food *ad libitum* in the research animal facilities  
763 of the University of Regensburg, Germany. All approved experimental animal  
764 procedures were conducted according to German federal and state government of  
765 Upper Palatinate, 54-2531.1-10/07, 54-2532.1-34/11; 54-2532.1-17/11, 54-2532.1-  
766 1/12, 54-2532.4-7/12).

767

### 768 **Cell lines**

769 MCF-7 and MDA-MB-231 breast cancer cell lines were obtained from the German  
770 Collection of Microorganisms and Cell Cultures (DSMZ) and Cell Lines Service (CLS),  
771 respectively. MCF 10A (CRL-10317), a non-tumorigenic mammary epithelial cell line,

772 was obtained from the American Type Culture Collection (ATCC<sup>70</sup>). The isogenic cell  
773 line MCF 10A PIK3CA<sup>E545K/+</sup> (HD 101-002) together with its parental cell line MCF 10A-  
774 parental (HD PAR-003) were purchased from Horizon Discovery, United Kingdom.  
775 MCF 10A-GFP cells were generated by transducing MCF 10A cells with  
776 pRRL.sin.cPPT.hCMV-GFP.WPRE (generously provided by Luigi Naldini, Italy).  
777 hTERT-HME1-derived cell lines, E4ORF1-transduced primary human umbilical vein  
778 endothelial cells (HUVECs) and murine embryonic fibroblasts C3H10T1/2 were  
779 generously provided by Alberto Bardelli, (University of Turin, Italy), Cyrus Ghajar (Fred  
780 Hutchinson Cancer Research Center, USA) and Max Wicha (University of Michigan,  
781 USA), respectively. The identity of all cell lines was confirmed by DNA fingerprinting  
782 analysis utilizing the GenePrint 10 System (Promega).

783 All MCF 10A-derived cell lines were cultured in Ham's Dulbecco's modified  
784 Eagle's/F12 (DMEM/F12) medium (Pan-Biotech, Germany) supplemented with 5%  
785 horse serum (Sigma-Aldrich, Germany), 2mM L-glutamine (Pan-Biotech, Germany),  
786 1% penicillin/streptomycin (Pan-Biotech, Germany), 20 ng/ml EGF (Sigma-Aldrich,  
787 Germany), 0.5 µg/ml hydrocortisone (Sigma-Aldrich, Germany), 10 µg/ml insulin  
788 (Sigma-Aldrich, Germany) and 0.1 µg/ml cholera toxin (Sigma-Aldrich, Germany). All  
789 hTERT-HME1-derived cells lines were maintained in DMEM/F12 medium (Pan-  
790 Biotech, Germany) supplemented with 10% FCS (Sigma-Aldrich, Germany), 2mM L-  
791 glutamine (Pan-Biotech, Germany), 1% penicillin/streptomycin (Pan-Biotech,  
792 Germany), 20 ng/ml EGF (Sigma-Aldrich, Germany), 0.5µg/ml hydrocortisone (Sigma-  
793 Aldrich, Germany) and 10 µg/ml insulin (Sigma-Aldrich, Germany). MDA-MB-231 cells  
794 were cultured in DMEM medium (Pan-Biotech, Germany) supplemented with 10% FCS  
795 (Sigma-Aldrich, Germany), 2 mM L-glutamine (Pan-Biotech, Germany) and 1%  
796 penicillin/streptomycin (Pan-Biotech, Germany). MCF-7 cells were propagated in  
797 RPMI 1640 medium (Pan-Biotech, Germany) supplemented with 10% FCS, 2 mM L-

798 glutamine and 1% penicillin/streptomycin. Murine embryonic fibroblasts C3H10T1/2  
799 were grown in DMEM (Pan-Biotech, Germany) medium supplemented with 5% fetal  
800 calf serum (Pan-Biotech, Germany), 2mM L-glutamine (Pan-Biotech, Germany), 1%  
801 penicillin/streptomycin (Pan-Biotech, Germany). E4ORF1-transduced primary human  
802 umbilical vein endothelial cells (HUVECs) were cultured using the EGM-2 Bullet Kit  
803 (Lonza, Germany). All cell lines were kept at 37°C and 5% CO<sub>2</sub> in a fully humidified  
804 incubator and negatively tested for mycoplasma by PCR.

805

### 806 **Isolation of disseminated cancer cells from bone marrow**

807 Mononuclear cells from bone marrow of non-metastasized breast cancer patients  
808 were plated on adhesive slides (Thermo Fisher) at a density of 0,5-1x10<sup>6</sup> cells/slide.  
809 Slides were stored at -20°C. From each patient, 1–2 10<sup>6</sup> bone-marrow cells were  
810 stained with the monoclonal antibody A45-B/B3 (AS Diagnostik, Germany) against  
811 cytokeratin 8/18/19 and developed with the anti-mouse AB-Polymer (Zytomed  
812 Systems, Germany). Unspecific binding was blocked using PBS/10% AB-serum (Bio-  
813 Rad, Germany). Alkaline phosphatase was developed with 5-bromo-4-chloro-3-indolyl  
814 phosphate and Nitroblue tetrazolium (BCIP/NBT; BioRad, Germany) as substrate.  
815 Slides were covered with phosphate-buffered saline under a cover glass and assessed  
816 by bright-field microscopy. An identical number of cells served as a control for staining  
817 with mouse IgG1 Kappa (MOPC-21) without known binding specificity. After removal  
818 of the cover glass, positive cells were isolated from the slide with a micromanipulator  
819 (Eppendorf PatchMan NP2) and subjected to whole genome amplification for  
820 subsequent *PIK3CA* mutation analysis.

821 For isolation of both, RNA and DNA from the same disseminated cancer cells,  
822 mononuclear cells from BM of non-metastasized breast cancer patients were  
823 subjected to immunofluorescent staining for EpCAM (Ber-EP4-FITC, Agilent or HEA-

824 125-PE, Miltenyi Biotec, Germany). Positive cells were isolated with a  
825 micromanipulator (Eppendorf PatchMan NP2, Eppendorf, Germany) and cells were  
826 subjected to whole transcriptome amplification to isolate RNA for subsequent PCR-  
827 analyses, transcriptome microarrays or RNA-seq and whole genome amplification for  
828 isolation of genomic DNA for subsequent analysis of copy number alterations.

829

### 830 **Isolation of circulating tumor cells**

831 Up to three 7.5 ml blood samples per patient were collected into CellSave® tubes  
832 (Menarini Silicon Biosystems, Italy). The CellSearch® Epithelial Cell Test (Menarini  
833 Silicon Biosystems, Italy) was applied for CTC enrichment and enumeration according  
834 to the instruction from the manufacturer. Samples from the SUCCESS study were  
835 prepared using a slightly modified protocol, pooling three separate CellSave® tubes  
836 (30 ml) as described elsewhere <sup>52</sup>. CTC-positive cartridges were sent from clinical  
837 centers to the Chair of Experimental Medicine and Therapy Research, Regensburg for  
838 cell isolation and molecular analysis. Cells were extracted from CellSearch® cartridges  
839 and isolated using the DEPArray™ system (Menarini Silicon Biosystems, Italy) and  
840 single cell DNA was amplified by whole genome amplification for subsequent *PIK3CA*  
841 mutation analysis.

842

### 843 **Isolation of human primary mammary epithelial cells**

844 Primary human non-cancerous mammary tissue was dissociated as previously  
845 described <sup>20</sup>. Briefly, upon mechanical digestion the tissue was subjected to enzymatic  
846 digestion overnight at 37°C in DMEM/F12 (Pan-Biotech, Germany) supplemented with  
847 10mM HEPES (Sigma-Aldrich, Germany), 2% bovine serum albumin (Sigma-Aldrich,  
848 Germany), 5 µg/ml insulin, 0.5 µg/ml hydrocortisone, 10 ng/ml cholera toxin (Sigma-  
849 Aldrich, Germany), 300 Units/ml collagenase and 100 Units/ml hyaluronidase (all from

850 Sigma-Aldrich, Germany). After removal of organoids and adipocytes by centrifugation  
851 at 210 g for 2 min, the cell suspension was passed over a 100 µm and 40 µm cell  
852 strainer to obtain a single cell suspension. Separation of fibroblasts from epithelial cells  
853 was accomplished by centrifugation at 350 g for 4 min and epithelial cells from the cell  
854 pellet were cultured as mammospheres.

855

### 856 **Mammosphere culture**

857 Cell lines and primary HMECs were seeded at a density of 10,000 cells/ml and 50,000  
858 cells/ml, respectively, in 3 cm, 6 cm or 10 cm cell culture dishes or 96 well flat-bottom  
859 plates (Thermo Fisher Scientific, Germany; Sigma-Aldrich, Germany; TPP AG,  
860 Switzerland). For analyses using the Operetta high content imaging system cells were  
861 plated with 10,000-50,000 cells/ml in 96-well µClear plates (Greiner Bio-One,  
862 Germany). To prevent attachment of cells all dishes/plates were coated with  
863 polyhydroxyethylmethacrylate (PolyHEMA) (12 mg/ml in 95% ethanol, Sigma-Aldrich,  
864 Germany) overnight. PolyHEMA-coated dishes/plates were UV-sterilized for 30 min.  
865 Cells were cultured in mammosphere medium consisting of MEBM (Lonza, Germany)  
866 supplemented with 1% penicillin/streptomycin (Sigma-Aldrich, Germany), 1xB27 (Life  
867 Technologies, Germany), 10 ng/ml EGF (Sigma-Aldrich, Germany), 10 ng/ml bFGF  
868 (Sigma-Aldrich, Germany), 4 µg/ml heparin (Sigma-Aldrich, Germany) and 1%  
869 methylcellulose, if the Operetta-high content imaging system was used. For some  
870 analyses mammosphere media was supplemented additionally with 10 ng/ml IL6  
871 (Sigma-Aldrich, Germany), 1.5 µg/ml anti-IL6 antibody (Sigma-Aldrich, Germany), 20  
872 ng/ml Hyper-IL6, 0.1 or 10 ng/ml recombinant human sgp130-Fc (R&D Systems,  
873 Germany). Hyper-IL6 was a kind gift of Stefan Rose-John, Christian-Albrechts-  
874 University, Germany. Mammospheres were cultured in a humidified atmosphere with  
875 5.5% CO<sub>2</sub> and 7% O<sub>2</sub> at 37°C for 4 or 7 days.



876 For setting-up of secondary mammosphere cultures, conducting flowcytometric or  
877 single cell expression analyses, first generation mammospheres were collected on day  
878 7 by gentle centrifugation (100 g), dissociated into single cell suspension with trypsin-  
879 EDTA (Pan-Biotech, Germany) for 3 min followed by trypsin neutralizing solution  
880 (Lonza, Germany). Single cell suspensions of secondary mammospheres were  
881 obtained as described for day 7-first generation mammospheres.

882

### 883 **Mammosphere counting**

884 The number of spheres with a diameter  $\geq 50 \mu\text{m}$  was determined by manually counting  
885 of a complete plate/dish at day 7 using an inverted microscope (Olympus, 10xair  
886 objective). Alternatively, spheres were counted using the Operetta CLS high-content  
887 imaging system (PerkinElmer, Hamburg, Germany) by adding CyTRAK Orange  
888 (BioStatus Ltd, United Kingdom) at day 4 to the wells at a final concentration of  $10 \mu\text{M}$ .  
889 After 60 min incubation, fluorescence imaging of the plates was performed using a 5x  
890 air objective and imaging of nine regions per well that were stitched to cover the entire  
891 well surface. Harmony high content analysis software was used to analyze the images  
892 and to count formation of spheres with diameter  $\geq 50 \mu\text{m}$  (Version 4.8; PerkinElmer,  
893 Hamburg, Germany).

894

### 895 **Isolation of LRCs, nLRCs, QSCs from mammosphere cultures**

896 HMECs were labeled with the PKH26 red fluorescent cell linker kit (Sigma-Aldrich,  
897 Germany) at 40 nM for 2 min at RT, the reaction was stopped with 10% FBS containing  
898 medium and cells were washed three times before plating into primary or secondary  
899 mammosphere cultures. LRCs and nLRCs were isolated from spheres of secondary  
900 mammosphere cultures that were dissociated with trypsin-EDTA (Pan-Biotech,  
901 Germany) for 3 min, neutralized with trypsin neutralizing solution (Lonza, Germany)

902 and stained with DAPI (Roche Diagnostics, Germany) for live/dead cell discrimination.  
903 Single LRCs and nLRCs were isolated as single PKH-positive/DAPI-negative and  
904 PKH-negative/DAPI-negative cells using a micromanipulator (Eppendorf PatchMan  
905 NP2, Eppendorf, Germany) or flow cytometric activated cell sorting. QSCs were  
906 isolated at day 7 from primary mammosphere cultures as single, DAPI-  
907 negative/EpCAM-positive/PKH-positive cells that did not form spheres and using the  
908 micromanipulator.

909 For flow cytometric assessment of proliferation of MCF 10A-LRCs and MCF 10A-  
910 nLRCs, MCF 10A cells were labeled with CFDA-SE (ebioscience, Germany) at 2  $\mu$ M  
911 for 10 min at 37°C in PBS/1% FBS, washed twice after stopping of the reaction with  
912 10% FBS containing medium and cultured as mammospheres. At day 4, single cell  
913 suspensions were obtained as described above and analyzed by flowcytometry.

914

#### 915 **In vitro differentiation of HMECs**

916 matrigel (growth factor reduced, without phenol-red, BD Biosciences, Germany) was  
917 diluted 1:1 with differentiation medium (Ham's Dulbecco's modified Eagle's/F12  
918 medium (Pan-Biotech, Germany), 5% fetal calf serum (Pan-Biotech, Germany), 5  
919  $\mu$ g/mL insulin (Sigma-Aldrich, Germany), 1  $\mu$ g/mL hydrocortisone (Sigma-Aldrich,  
920 Germany), 10  $\mu$ g/mL cholera toxin (Sigma-Aldrich, Germany), 10 ng/mL EGF (Sigma-  
921 Aldrich, Germany), 1 $\times$  penicillin/streptomycin/fungizone, (Lonza, Germany)), smeared  
922 in 2 well slides and incubated for 15 min. at 37°C. On top, 50,000 cells from  
923 disaggregated secondary mammospheres were added. After incubation for 30 min at  
924 37°C cells were covered with an additional matrigel layer and incubated for additional  
925 15 minutes at 37 °C. Differentiation medium was added at the end of the embedding  
926 procedure and exchanged every two days. Cultures were examined 3-4 weeks post  
927 embedding for the development of tubular and acinar structures.

928

929 **Culture of primary human mesenchymal stem cells and generation of**  
930 **osteoblasts**

931 Mononuclear cells from bone marrow aspirates were cultured at a density of  $2 \times 10^6$   
932 cells in a T75 flask (Sarstedt, Germany) in DMEM with 1g/L glucose, 4mM glutamine  
933 and 1mM sodium pyruvate (all from Life Technologies, Germany), supplemented with  
934 10% MSC-qualified FBS (WKS Diagnostik, Germany), 1% penicillin/streptomycin (Life  
935 Technologies, Germany) and 1ng/ml bFGF (Peprotech, Germany). Adherent cells  
936 were cultured for 3 weeks and cryo-conserved. Before cryo-conservation MSCs were  
937 tested for the expression of CD45, CD34, CD90, CD105, CD44 and Nestin by flow  
938 cytometry (Supplementary Fig. 5). Also, the ability of MSCs to differentiate into  
939 adipocytes and osteoblasts was tested as previously described <sup>71</sup>. Briefly, osteoblasts  
940 for co-culture experiments were generated by culturing confluent MSC-cultures in  
941 DMEM with high glucose (Life Technologies, Germany) supplemented with 10% MSC-  
942 qualified FBS (WKS Diagnostik, Frankfurt, Germany) 1% penicillin/streptomycin (Life  
943 Technologies, Germany),  $10^{-7}$  M Dexamethasone, 25 µg/ml L-ascorbic acid and 3 mM  
944 sodium dihydrogen phosphate (all from Sigma-Aldrich, Germany) for 21 days with  
945 medium being changed every other day.

946

947 **Co-cultures of MCF10A with MSCs, OBs, HUVECs**

948 MSCs and HUVECs were plated at a density of  $4 \times 10^5$  cells/well of a 6 well plate  
949 (Corning, Germany) in their respective growth medium. The next day, medium was  
950 exchanged to MCF 10A growth medium and  $1 \times 10^5$  MCF 10A-GFP cells were added  
951 to each well. In case of co-cultures with OBs,  $4 \times 10^5$  MSCs per  $9.6 \text{ cm}^2$  surface of a 6  
952 well plate (Corning, Germany) were plated and differentiated into OBs for 21 days. On  
953 day 22 medium was exchanged to MCF 10A growth medium and  $1 \times 10^5$  MCF 10A-GFP

954 cells were added to each well. For cultures with transwells, MSCs were plated at  
955  $1.75 \times 10^5$  cells per  $4.2 \text{ cm}^2$  of a 6-well transwell insert (Falcon 353090, VWR, Germany).

956

### 957 **Xenotransplantations of DCCs, HMECs and MDA-MB-231 cells**

958 For xenotransplantations of DCCs, mononuclear cells from BM-aspirates of non-  
959 metastasized or metastasized breast or prostate cancer patients were enriched for  
960 human EpCAM or depleted of human  $\text{CD45}^+\text{CD33}^+\text{CD11b}^+$  cells and erythrocytes  
961 using a mix of CD45, CD33, CD11b and Glycophorin A microbeads according to the  
962 manufacturer's instructions (Miltenyi Biotec, Germany). Each sample was then split  
963 into halves: one half was subjected to DCC-enumeration by staining for CK8/18/19 or  
964 EpCAM. The other half of the cell suspension was transplanted without *ex vivo*  
965 expansion into NSG-mice using one to two injection routes (non-metastasized  
966 patients) or three to four different injection routes (metastasized patients). In some  
967 cases mononuclear cells were cultured as mammospheres in 6 cm culture plates  
968 coated with polyhydroxyethylmethacrylate (12 mg/ml, Sigma), under hypoxic  
969 conditions (7%  $\text{O}_2$ ) at  $37^\circ\text{C}$  and in mammosphere medium containing 10 nM HEPES  
970 (Sigma-Aldrich, Germany), 10  $\mu\text{g/ml}$  insulin (all from PAN-Biotech, Germany), 5 ng/ml  
971 GRO- $\alpha$  (R&D Systems, Germany), 20 ng/ml hyper interleukin-6 (kindly provided by S.  
972 Rose-John) and 0.2% Methylcellulose (Sigma-Aldrich, Germany). Cultures were  
973 monitored weekly for sphere growth.

974 To transplant spheres or EpCAM-enriched or  $\text{CD45/CD11b/erythrocyte}$  depleted bone  
975 marrow, cells/spheres were collected in a microwell (volume 10-15  $\mu\text{l}$ , Terasaki,  
976 Greiner Bio-One, Germany) pre-coated with polyhydroxyethylmethacrylate (12 mg/mL,  
977 Sigma-Aldrich, Germany). Cells or spheres were transplanted in a final volume of 30  
978  $\mu\text{l}$  and 25% high-concentration matrigel (BD Biosciences, Germany) as published  
979 before <sup>9</sup>. Cells were injected with an insulin syringe (Microfine, 29G, U-50, BD

980 Biosciences, Germany) sub-cutaneously, intra-venously, intra-femorally or sub-renally  
981 in 4-8 weeks old male or female NSG or NOD.Cg-Prkdc<sup>scid</sup> mice. Mammary fat pad  
982 injections were performed in the 4<sup>th</sup> pre-cleared mammary fat pad of 3 weeks old  
983 female mice in 50% matrigel (BD Biosciences, Germany). Breast or prostate cancer-  
984 origin of xenografts were verified by a pathologist.

985 To assess the differentiation ability of HMEC-spheres *in vivo*, secondary  
986 mammospheres were dissociated and 200,000 cells were mixed with 225,000 pre-  
987 irradiated (15 Gy) C3H10T1/2 mouse fibroblasts. The cell suspension was then mixed  
988 1:1 with matrigel (growth factor reduced without phenolred, BD Bioscience, Germany)  
989 and injected in the 4<sup>th</sup> pre-cleared mammary fat pad of 3 weeks old female NSG mice.  
990 Mice were euthanized 8 weeks after transplantation and analyzed for the presence of  
991 human mammary gland tissue.

992 MDA-MB-231 cells grown under adherent conditions were pre-treated with PBS, an  
993 anti-IL6 antibody (1.5 µg/ml, Sigma-Aldrich, Germany) or HIL6 (20 ng/ml, kind gift of  
994 Stefan Rose-John, Christian-Albrechts-University, Germany) for 3 hours and 20,000  
995 cells were transplanted into the mammary fat pad of NSG mice as 1:1 mixture with  
996 matrigel (BD Biosciences, Germany) in the 4<sup>th</sup> pre-cleared mammary fat pad of 3  
997 weeks old female NSG-mice. All mice were analyzed when first tumors reached a  
998 diameter of about 10 mm.

999

#### 1000 **Detection of human DCCs and mammary gland in NSG-mice**

1001 Lung and bone marrow of mice transplanted with human DCCs were analyzed for the  
1002 presence of DCCs or metastasis. Lungs were examined by a pathologist. For  
1003 identification of disseminated cancer cells in the mouse bone marrow, mononuclear  
1004 cells were screened accordingly to the method for human DCCs using  
1005 immunofluorescent staining of the cell suspension with anti-human EpCAM (Ber-EP4-

1006 FITC, Agilent, or HEA-125-PE, Miltenyi-Biotec Germany) or adhesive slides and  
1007 staining anti cytokeratin 8/18/19 (A45-B/B3, AS Diagnostik, Germany). Unspecific  
1008 binding was blocked by using PBS with 5% human AB serum (Bio-Rad, Germany) and  
1009 5% mouse serum (Agilent, Germany). Positive cells were isolated with the  
1010 micromanipulator and subjected to whole genome amplification.

1011 Mammary glands of mice transplanted with HMECs were dissected, fixed and stained  
1012 with an anti-human cytokeratin 18 antibody (20 µg/ml, clone CK2, Millipore, Germany).  
1013 Cells expressing human cytokeratin 18 were laser-microdissected (PALM Microbeam  
1014 system, Bernried, Germany) and subjected to whole genome amplification.

1015 The human origin of DCCs or CK18<sup>+</sup> cells isolated from mouse bone marrow or laser-  
1016 microdissected from mammary glands of NSG-mice was confirmed by a PCR  
1017 discriminating between the human and mouse cytokeratin 19 gene: forward primer: 5'-  
1018 TTC ATG CTC AGC TGT GAC TG-3' and reverse primer 5'-GAA GAT CCG CGA CTG  
1019 GTA C-3', annealing 58°C, amplicon 621 bp for the human sequence.

1020

1021 **Quantification of HER2 and PGR staining in tissue sections by TissueFAX**  
1022 **cytometry.**

1023 Tissue sections were stained with an automated staining machine (Ventana:  
1024 BenchMark ULTRA). Tissue sections used for analysis were stained within the same  
1025 run. Images of stained tissue sections were scanned with the TissueFAXSi-plus  
1026 imaging system (TissueGnostics, Vienna, Austria; acquisition software: TissueFAXS  
1027 version 3.5.129) equipped with a digital Pixelink colour camera (PCO AG, Kehlheim,  
1028 Germany). Images for the analysis of Ki-67 staining were analysed with HistoQuest  
1029 software version 6.0.1.130 (TissueGnostics, Vienna, Austria). Using that software, two  
1030 markers were created: hematoxylin as 'master marker' (nucleus) and Ki-67 as 'non-  
1031 master marker'. To achieve optimal cell detection, the following parameters were

1032 adjusted: (i) nuclei size; (ii) discrimination by area; (iii) discrimination by gray and (iv)  
1033 background threshold. For the evaluation of the percentage of Ki-67expressing cells,  
1034 scatter plots were created, allowing the visualization of corresponding cells in the  
1035 source region of interest using the real-time back gating feature. The cut-off  
1036 discriminated between false events and specific signals according to cell size and  
1037 intensity of Ki-67 staining. For the PBS-group 112,098 cells (33 regions, 8.25 mm<sup>2</sup>),  
1038 anti-IL6 group 161,279 cells (41 regions, 10.25 mm<sup>2</sup>) and HIL6-group 98,812 cells (26  
1039 regions, 6.50 mm<sup>2</sup>) were analysed.

1040

#### 1041 **Whole genome amplification and analysis of copy number alterations**

1042 Single-cell genomic DNA was subjected to whole genome amplification (WGA) using  
1043 the previously described <sup>72, 73</sup> or the commercially available version (*Ampli1*<sup>TM</sup> WGA,  
1044 Menarini Silicon Biosystems). DCCs isolated from BM of patients or NSG-mice were  
1045 subjected to CNA analysis as previously described (mCGH) <sup>72, 73</sup> or using the *Ampli1*<sup>TM</sup>  
1046 LowPass kit (Menarini Silicon Biosystems) according to the manufacturer's  
1047 instructions.

1048

#### 1049 ***PIK3CA* sequencing of single cells**

1050 *PIK3CA* mutation in CTCs and DCCs was assessed using the *Ampli1*<sup>TM</sup> *PIK3CA* Seq  
1051 kit (Menarini Silicon Biosystems) or amplicon-based sequencing on single cells  
1052 following *Ampli 1*<sup>TM</sup> WGA. For amplicon-based sequencing the following primers were  
1053 used: Exon 9 forward primer 5'- AAG CAA TTT CTA CAC GAG A- 3' and reverse  
1054 primer 5'- CC TTA TTT ATT TCG TCT TAA ATG- 3', annealing 58°C, amplicon size  
1055 189 bp; Exon 20 forward primer 5'- TCT AGC TAT TCG ACA GCA TGC -3' and reverse  
1056 primer 5'- T ACC TAA CCT AGA AGG TGT GTT -3' annealing 58°C, amplicon size  
1057 221 bp. For each exon, 1 µl of WGA-product of CTCs or DCCs was used for the PCR.

1058 Resulting products were loaded on a 1.5% agarose gel and negative PCR results were  
1059 considered dropouts for *PIK3CA* analysis. Positive CTC samples were purified using  
1060 QIAquick purification kit (Qiagen, Germany) according to the manufacturer's protocol  
1061 with the exception that elution at the end of the protocol was in 25 µl water. Purified  
1062 CTC samples were sent to a sequencing provider (Sequiserve, Germany). PCR  
1063 products from positive DCC samples were purified by the sequencing provider (GATC,  
1064 Germany).

1065

### 1066 **Whole transcriptome amplification (WTA) of single spheres and cells**

1067 Whole transcriptome amplification of single cells or undissociated spheres was  
1068 performed as previously described<sup>19, 74</sup>. The quality of WTA products was assessed  
1069 by expression analysis of three housekeeping genes: *EEF1A1*, *ACTB* and *GAPDH*.  
1070 Only samples positive for all three markers were used for downstream analyses.

1071

### 1072 **mRNA microarray experiments**

1073 MCF 10A cells were cultured as mammospheres in the presence or absence of 10  
1074 ng/ml IL6 (Sigma-Aldrich, Germany), 10 ng/ml IL6 + 0.1 ng/ml recombinant human  
1075 sgp130-Fc (R&D Systems, Germany) or 20 ng/ml Hyper-IL6 (kind gift of S. Rose-John,  
1076 Christian-Albrechts-University, Germany) for 12 and 24 hours. Cells were seed in  
1077 triplicates for all conditions and time points. After 12 and 24 hours, cells were collected  
1078 by centrifugation (5 min at 500 x g) and RNA was isolated using RNeasy Mini Kit  
1079 (RNeasy Mini Kit, Qiagen, Germany) according to the manufacturer's protocol.  
1080 Microarray analysis was performed using the Whole Human Genome Microarray Kit,  
1081 4x44K (G4112F, Agilent Technologies, Germany).



1082 For transcriptome analysis of LRCs, nLRCs and QSCs, HMECs were cultured and  
1083 cells isolated as described above and cDNA was obtained from manually isolated  
1084 single cells using whole transcriptome amplification.

1085 Labelling of cDNA was performed by PCR with Cy5-labelled primers. Reaction mix  
1086 contained 5 µl of buffer I (Expand Long Template, Roche, Germany), 3% (v/v)  
1087 deionized formamide, 0.35 mM each dNTP, 2.5 µM 5'-  
1088 U\*CAGAAU\*TCAUGCCC\*CCCC\*CCCC\*C-3' primer (\*denotes nucleotides  
1089 conjugated with Cy5 fluorophore; Metabion), 3.75 U of PolMix (Expand Long Template,  
1090 Roche, Germany) and 1 µl of WTA-product or 100 ng cDNA from bulk RNA  
1091 preparations of MCF 10A cells in a final volume of 49 µl. PCR parameters were: one  
1092 cycle with 1 min at 95 °C, 11 cycles with 15 s at 94 °C, 1 min at 60 °C, and 3 min 30 s  
1093 at 65 °C, 3 cycles where the elongation time was increased 10 s per cycle, and finally  
1094 one cycle with an elongation time of 7 min. Labelled products were purified using a  
1095 PCR purification kit (Qiagen, Germany) according to the instructions of the vendor.  
1096 Purified Cy5-labelled DNA was denatured by incubation for 5 min at 95 °C followed by  
1097 incubation on ice. Hybridization solution was prepared by mixing 42 µl of denatured  
1098 Cy5-labelled DNA, 55 µl of 2x HiRPM hybridization buffer (Agilent, Germany), 11 µl of  
1099 10X GE Blocking agent (Agilent, Germany), 4 µl of 25% (v/v) Tween-20, and 4 µl of  
1100 25% (v/v) Igepal. Four 100 µl samples of hybridization mix were overlaid on four  
1101 hybridization fields of Agilent Whole Human Genome (4x44K) Microarray Kit with  
1102 SurePrint microarray slides and incubated for 17 h at 65 °C under constant rotation.  
1103 After hybridization, slides were washed in Agilent Wash buffer 1 for 1 min on a shaker  
1104 in the dark and incubation continued in Agilent Wash buffer 2 pre-warmed to 37 °C.  
1105 Slides were dried by washing for 30 s in acetonitrile and scanned on a GenePix 4400  
1106 A scanner (Molecular Devices, Germany). Numerical readouts of fluorescence

1107 intensities (GPR files) were generated using GenePixPro 7 (Molecular Devices,  
1108 Germany).

1109

### 1110 **NGS mRNA library preparation and sequencing**

1111 The majority of the (TTT)<sub>7</sub> and (CCC)<sub>5</sub> nucleotides forming the ends of cDNA products  
1112 were removed by a limited-cycle PCR with primers introducing BpuEI and BglII  
1113 restriction sites followed by restriction enzyme digestion. Briefly, 1 µl of a 1/5 dilution of  
1114 the original WTA sample was used in a total volume of 20 µl with 24 µM of primer CP2-  
1115 BpuEI (5'-TCA GAA TTC ATG (CCC)<sub>5</sub> GTC TTG AGT TTT TT- 3') and 24 µM of primer  
1116 Cp2-BglII-13C (5'-TCA GAA TTC ATG (CCC)<sub>2</sub> CGG (CCC)<sub>2</sub>- 3') for amplification. After  
1117 an initial denaturation at 95°C for 1min, 5 cycles of 94°C for 15 sec, 60°C for 1 min,  
1118 and 65°C for 210 sec and 3 cycles of 94°C for 15 sec, 60°C for 1min, and 65°C for 210  
1119 sec (+10 sec/cycle) were carried out followed by a final extension step of 7 min.  
1120 Resulting cDNA products were purified with 1.8 volume of Ampure XP beads  
1121 (Beckman Coulter, USA) according to the manufacturer's instructions and eluted in 40  
1122 µl of distilled water. Five µl of EcoRI buffer supplemented with 80 µM S-adenosyl  
1123 methionine (New England Biolabs, Germany) and 2.5 µl BpuEI (5 U/µl) were added in  
1124 a volume of 50 µl and incubated at 37°C for 1 hr followed by heat inactivation of the  
1125 enzyme for 20 min at 65°C. Subsequently 1 µl of EcoRI buffer supplemented with 80  
1126 µM S-adenosyl methionine and 2.5 µl BglII (10 U/µl) were added in a final volume of 60  
1127 µl and incubated 3 hrs at 37°C followed by heat inactivation of the enzyme. The  
1128 complete restriction digest was purified with 1.8 volume of Ampure XP beads according  
1129 to the manufacturer's instructions and eluted in 16 µl 10 mM Tris-Cl, pH 8.5 (Elution  
1130 buffer EB, Qiagen, Germany). The length distribution of purified cDNA populations was  
1131 determined on the Bioanalyzer 2100 (Agilent Technologies, USA). Optimal Covaris  
1132 settings for fragmentation of each purified cDNA sample to 350 bp insert size were

1133 determined on the basis of the average length distribution. Subsequently sequencing  
1134 libraries were prepared according to the TruSeq DNA PCR-Free Library Prep Kit  
1135 (Illumina, USA). Resulting libraries were quantified with KAPA Library Quantification  
1136 Kit for Illumina Platforms (Kapa Biosystems, RSA), pooled in equal molar ratios and  
1137 sequenced on Illumina NovaSeq 6000 platforms.

1138

### 1139 **IL6, IL6RA and gp130 mRNA expression analysis in single cells**

1140 IL6, membrane IL6 receptor, spliced IL6 receptor and gp130 expression was assessed  
1141 by PCR using the MJ Research Peltier Thermal Cycler Tetrad (Bio-Rad, Germany)  
1142 with the following primers: IL6 (forward primer 5'- GAG AAA GGA GAC ATG TAA CAA  
1143 GAG T -3', reverse primer 5'- GCG CAG AAT GAG ATG AGT TGT -3', annealing 62°C,  
1144 amplicon size 388 bp), membrane versus spliced IL6RA (forward primer 5'- CTG CAA  
1145 ATG CGA CAA GCC TC -3', reverse primer 5'- GTG CCA CCC AGC CAG CTA TC -  
1146 3', annealing 62°C). The spliced and membrane-bound IL6 receptor can be  
1147 distinguished according to their PCR product size: mL6RA 380 bp, spliced IL6RA 286  
1148 bp. Gp130 forward primer was 5'- GGA CCA AAG ATG CCT CAA CT -3', reverse  
1149 primer 5'- GGC AAT GTC TTC CAC ACG A -3', annealing 58°C and amplicon size 280  
1150 bp.

1151 gp130 expression was assessed by quantitative PCR on re-amplified and purified  
1152 (Qiagen PCR Purification Kit, Qiagen, Germany) WTA products of single cells as  
1153 previously described<sup>74</sup>. To normalize for the template input quantification of yields in  
1154 the individual samples was spectrophotometrically conducted using the NanoDrop  
1155 2000 instrument. The DNA input for each qPCR of a single cell was normalized to 2.5  
1156 ng and the qPCR run as previously described with the following primers: *gp130* forward  
1157 primer 5'- ATA TTG CCC AGT GGT CAC CT -3' and reverse 5'- AGG CTT TTT GTC  
1158 ATT TGC TTC T -3', annealing 58°C, amplicon size 125 bp. Fold changes in gp130

1159 expression were calculated from the delta Cp-values between MCF 10A or MCF-7  
1160 cultured with and without MSCs.

1161

## 1162 **Flowcytometry**

1163 Spheres or adherent cells were trypsinized with trypsin/EDTA (Pan-Biotech, Germany)  
1164 for 3 min, if not stated otherwise. MSC monocultures and co-cultures of MCF10A-GFP  
1165 cells with MSCs, OBs and HUVECs were harvested by trypsin/EDTA (Pan-Biotech,  
1166 Germany) for 5 min and using cell-scrapers. To reduce non-specific binding single cell  
1167 suspensions were incubated for 5 min at 4°C with PBS/10% AB-serum (Bio-Rad,  
1168 Germany), subsequently stained with fluorescence-labeled or biotinylated antibodies  
1169 for 15 min at 4°C and washed once with PBS/2% FCS/0.01% NaN<sub>3</sub>. In case of  
1170 biotinylated primary antibodies, PE-labeled streptavidin (Dianova, Germany) was used  
1171 as secondary staining reagent. Cells were stained using the following antibodies: anti-  
1172 human CD24-APC (ML5), anti-human CD34-PE (581), anti-human CD44-V450 (G44-  
1173 26), anti-human CD45-FITC, APC or PerCP-Cy5.5 (HI30), anti-human CD90 Alexa  
1174 Flour 700 (5E10), anti-human CD105-FITC (43A3), anti-human CD130-APC  
1175 (2E1B02), anti-human Nestin-PE (10C2), biotinylated anti-human IL6R (UV4), isotype  
1176 control mouse IgG2a-APC (MOPC-21), isotype control mouse IgG2b-V450 (MOPC-  
1177 21), isotype control IgG1-biotin (MOPC-21) (all purchased from BioLegend, Germany)  
1178 and anti-human EpCAM (HEA-125, Miltenyi-Biotech, Germany). Viability dye eFlour  
1179 780 (ebioscience, Germany) was used for live/dead cell discrimination. Cells were  
1180 analyzed on a LSR II machine equipped with FACS DIVA 5.03 software (BD  
1181 Bioscience, Germany) and data was analyzed with FloJo 8.8.6, 10.1 or 10.5.3  
1182 (Treestar, USA). Sorting of PKH26-labeled LRC and nLRCs was performed with a  
1183 FACS Aria cell sorter (BD Bioscience, Germany).

1184

1185 **IL6 and soluble IL6RA detection by ELISA**

1186 IL6 and soluble IL6RA concentrations were assessed in 100 µl cultured media obtained  
1187 from HMECs or MCF 10A cells propagated under anchorage dependent or anchorage  
1188 independent conditions with the *Human IL-6 DuoSet* or *Human sIL-6R alpha DuoSet*  
1189 ELISA kit (R&D Systems, Germany) following the manufacturer's recommendations.

1190

1191 **Inhibition of ADAM-proteases**

1192 MCF 10A cells were treated for 48 hrs with 20 µM TAPI-2 acetate salt (Sigma-Aldrich,  
1193 Germany). The culture supernatant was tested for the presence of IL6 and sIL6RA by  
1194 ELISA.

1195

1196 **Immuno-(western) blotting**

1197 Cell lysates were prepared using ice cold RIPA Buffer supplemented with cOmplete,  
1198 EDTA-free Protease Inhibitor Cocktail and PhosSTOP™ (all from Sigma-Aldrich,  
1199 USA). The Protein concentration of lysates was determined with Pierce™ BCA Protein  
1200 Assay Kit (Thermo Fisher Scientific, USA). Cell lysates were mixed with 4x Laemmli  
1201 Sample Buffer (Bio-Rad, USA) containing 10% 2-Mercaptoethanol (Sigma-Aldrich,  
1202 USA) and denatured for 5 min at 95°C. 10 µg of protein/lane were loaded on 12% Mini-  
1203 PROTEAN® TGX™ Gels (Bio-Rad, USA) and protein separation was performed with  
1204 SDS PAGE Running Buffer (25 mM Tris, 192 mM glycine, 0,1% SDS). Proteins were  
1205 blotted onto Immobilon-P PVDF Membranes (Millipore, USA). For washing of  
1206 membranes TBS-T (137 mM NaCl, 20 mM Tris, 0,05% (w/v) Tween-20, pH 7.6) was  
1207 used. To detect signaling protein, the following primary antibodies (all from Cell  
1208 Signaling Technology, USA) were used at dilutions according to manufacturer' s  
1209 instructions: anti-phospho-STAT3<sup>Tyr705</sup> (clone D3A7), anti-phospho-AKT<sup>Ser473</sup> (clone  
1210 D9E), anti-phospho-ERK1/2<sup>Thr202/Tyr204</sup> (clone E10), anti-STAT3 (clone 124H6), anti-

1211 AKT (clone 40D4) and anti-ERK1/2 (clone 137F5). As loading control an anti- $\alpha$ -Tubulin  
1212 antibody (Sigma-Aldrich, USA, clone DM1A; 1:5000) was used. This was followed by  
1213 incubation with horseradish peroxidase (HRP)-conjugated goat anti-rabbit IgGs or goat  
1214 anti-mouse IgGs (both Sigma-Aldrich, USA; 1:10000). Protein bands were visualized  
1215 using SuperSignal™ West Pico PLUS Chemiluminescent Substrate (Thermo Fisher  
1216 Scientific, USA). Chemiluminescence was recorded by a ChemiDoc™ MP Imaging  
1217 System and analyzed with Image Lab™ Software (both Bio-Rad, USA). Membranes  
1218 were stripped for re-probing using Restore™ Plus Western Blot Stripping Buffer  
1219 (Thermo Fisher Scientific, USA) according to manufacturer's instructions.

1220

## 1221 **Bioinformatics**

1222 **MCF 10A HIL6/IL6-stimulation mRNA microarray data.** Gene expression data  
1223 were obtained using the Agilent Whole Human Genome Microarray Kit (4x44K) and  
1224 quality assessed by inspection of chip raw images and gene expression frequency  
1225 distributions. All 24 expression profiles (3 biological replicates, 4 treatment groups, 2  
1226 time points) were of sufficiently high quality for further bioinformatic analysis. Raw gene  
1227 expression data were background corrected (limma Bioconductor-package<sup>75</sup>, version  
1228 3.36.5, normexp method), log<sub>2</sub>-transformed and normalized by quantile normalization.  
1229 Replicated probes (identical Agilent IDs) were replaced by their median per sample.  
1230 Gene ranking was performed using empirical array quality weights<sup>76</sup> and linear models  
1231 from the limma Bioconductor-package (version 3.36.5) using standard treatment  
1232 versus control contrasts. Gene annotation (Supplementary Table 3) was obtained by  
1233 aligning Agilent oligo sequences to NCBI RefSeq genes (August 8, 2019) using BLAST  
1234<sup>77</sup> (version 2.9.0) requiring 100% identical matches, a maximum length difference  
1235 between oligo and target sequence of one, and less than 100 hits per oligo. In addition,  
1236 ensembl annotation<sup>78</sup> (version 97) was retrieved and used as a secondary information

1237 source (e.g. for oligos that were unannotated by NCBI RefSeq). GENCODE metadata  
1238 (version 32)<sup>79</sup> were used as complementary annotation. For gene lists, graphical  
1239 display and functional annotation, probes targeting the same gene were  
1240 disambiguated by retaining only the probe with the lowest *P value*. Differential gene  
1241 expression was defined by a maximum FDR-adjusted *P value* of 0.05 and a minimum  
1242 absolute log<sub>2</sub>-fold change of log<sub>2</sub>(1.5) = 0.58. Computations were performed using R  
1243 version 3.5.1<sup>80</sup>.

1244

1245 **Mammary cell subpopulation mRNA microarray data.** Human mRNA expression  
1246 data from Lim et al.<sup>41</sup> based on Illumina HumanWG-6 v3.0 BeadChip microarrays were  
1247 downloaded from the Gene Expression Omnibus (GEO) (series GSE16997). Data pre-  
1248 processing, analysis and annotation was performed analogous to the procedure  
1249 detailed above for MCF 10A cells except that the linear model included all pairwise  
1250 contrasts between the three cell types.

1251 Fold change analysis of the MCF 10A and mammary cell subpopulation data was  
1252 performed by first selecting a pairwise comparison from the MCF 10A data (e.g.  
1253 classical IL6 stimulation vs. control) and another from the mammary subpopulation  
1254 data (e.g. luminal progenitor vs. mature luminal), each performed according to  
1255 moderated t-testing (limma Bioconductor-package, version 3.36.5). The differential  
1256 gene lists of both comparisons were intersected and the randomness of their overlap  
1257 quantified using hypergeometric testing (Supplementary Table 6). Second, the log-  
1258 fold-changes of both comparisons were correlated without centering (i.e. without  
1259 subtracting the respective group means) because reference to zero log-fold was  
1260 intended. Correlation *P values* were calculated according to centered Pearson  
1261 correlation.

1262

1263 **LRC/QSC/nLRC mRNA microarray data.** Gene expression data were obtained using  
1264 the Agilent Whole Human Genome Microarray Kit (4x44K). All chips passed quality  
1265 assessment and were pre-processed and annotated as described for MCF 10A cells  
1266 above except that no fold-change limit (originally used in the data of Lim et al. <sup>41</sup> and  
1267 thus also employed for MCF 10A cells) was applied. The data showed patient effects  
1268 that were accounted for by including patient IDs as second covariate in the linear model  
1269 after safeguarding independence between patients and sample groups: Cramer's V  
1270 with bias correction = 0; R-package rcompanion version 2.3.7 <sup>81</sup>. For graphical display  
1271 these effects were compensated by using the function removeBatchEffect from the  
1272 Bioconductor package limma (version 3.36.5). Dimension reduction to 2D according to  
1273 t-SNE <sup>82</sup> (Fig. 2c) and pairwise differential expression analysis (number of differentially  
1274 expressed genes was: 35 for nLRC vs. QSC, 127 for LRC vs. nLRC and 163 for LRC  
1275 vs QSC; FDR-adjusted P value < 0.05, Supplementary Table 2) revealed that nLRC  
1276 and QSC were much more similar to each other as compared to LRC. To concentrate  
1277 on main effects, nLRC and QSC were pooled resulting in 216 differentially expressed  
1278 genes for LRC vs (nLRC+QSC). Enrichment analysis was aimed at the NCI-Nature  
1279 Pathway Interaction Database <sup>83</sup> for its focus on cancer research and treatment and  
1280 conducted using the R-package enrichR <sup>84</sup> (version 2.1).

1281  
1282 **DCC and HD mRNA sequencing data.** The sequencing quality was evaluated per  
1283 sample with FastQC <sup>85</sup> and in a multi-sample comparison with MultiQC <sup>86</sup> and the  
1284 independent tool MusaQC before and after adapter trimming and contamination  
1285 screening. Briefly, raw sequencing data of single cells (30 M0- , 11 M1-stage DCCs  
1286 and 15 EpCAM+ cells from healthy donors (HD) from 21, 5 and 7 patients, respectively)  
1287 were trimmed and remaining adapter sequences as well as low sequencing quality  
1288 bases at the end of each read were removed using BBDuk <sup>87</sup>. In order to increase the



1289 mapping quality (lowering false positive alignments), read decontamination was  
1290 performed using BioBloom Tools <sup>88</sup> with filters for the genomes of *Homo sapiens*  
1291 (hg38), *Mus musculus* (mm10), *Escherichia coli* (BL21), *Mycoplasma pneumoniae*  
1292 (M129), *Sphingobium* sp (SYK-6), *Bradyrhizobium japonicum* (USDA 110), *Pichia*  
1293 *pastoris* (GS115), *Malessia globosa* (CBS 7966), *Aspergillus fumigatus* (Af293) and a  
1294 set of viral genomes (RefSeq, 5k+ genomes). All reads that did not map exclusively to  
1295 hg38 (GENCODE version 27, GRCh38.p10) or did not map at all were defined as likely  
1296 contaminations and discarded from downstream processing. Subsequently, the  
1297 cleaned sample reads were aligned to the reference genome hg38 with STAR (version  
1298 2.5.1b) <sup>89</sup>. Uniquely mapped reads were counted per gene per sample using  
1299 featureCounts from Subread <sup>90</sup>. We performed quality control and checked for outlier  
1300 samples with the Bioconductor-package scater (version 1.12.2) <sup>91</sup> using the functions  
1301 calculateQCMetrics and plotPCA for QC metrics with outlier detection enabled. The  
1302 results showed that none of the samples was an outlier. Thus, we kept all samples for  
1303 further analysis. Samples were sequenced in two batches with only very little  
1304 association between batches and phenotype (M0/M1/HD): Cramer's V with bias  
1305 correction = 0.11; R-package rcompanion<sup>81</sup> (version 2.3.7). We applied the  
1306 multiBatchNorm (Bioconductor package: batchelor 1.0.1) to all cells and further  
1307 rescaleBatches (Bioconductor package: batchelor 1.0.1 <sup>92</sup>) to DCCs to remove batch  
1308 effects and get the normalized log2 counts. After batch correction we obtained 8626  
1309 and 7359 expressed genes for HD cells and DCCs on average, respectively.

1310 The top 500 most variable genes were analyzed using PCA. From the genes annotated  
1311 by GO terms containing "B cell", "Epithelial" or "Epithelium", the top 100 most variable  
1312 were subjected to PCA. PCAs were calculated using prcomp (R stats package).

1313 For pathway enrichment analysis, we filtered for protein coding genes and compiled  
1314 2x2 contingency tables for each sample and each pathway according

1315 to whether genes were expressed ( $\log_2$  (normalized counts) $>0$ ) and present in the  
1316 pathway. Contingency tables were subsequently evaluated according to one-tailed  
1317 Fisher's exact test (R stats package). Calculations were performed using R version  
1318 3.6.0.

1319

1320 **Analysis of copy number alterations.** To enable the combined analysis of mCGH-  
1321 and LowPass-Seq-derived CNA profiles, the genomic coordinates obtained with the  
1322 LowPass bioinformatics analysis pipeline (Menarini Silicon Biosystems, Italy) were  
1323 converted to cytoband information using a custom script for R<sup>80</sup> and the UCSC  
1324 Goldenpath reference (version hg38<sup>93</sup>). Afterwards, the aberrations were manually  
1325 screened and compared to the respective CNA profile images before being annotated  
1326 according to the specifications of the International System for Human Cytogenetic  
1327 Nomenclature (ISCN)<sup>94</sup>. Small aberrations  $< 1$  megabase as well as recurring  
1328 technical artefacts in chromosome 1p and centromeric and telomeric regions were  
1329 excluded. Finally, the combined ISCN-annotated aberration data (mCGH and  
1330 LowPass-Seq) were stratified into M0 and M1 groups and submitted to the Progenetix  
1331 user data tool<sup>95</sup> to generate individual frequency plots for M0 and M1 cells.

1332

1333 **Data availability.** All genomic results of this study are available within the article and  
1334 its Supplementary Information.

1335

### 1336 **Statistical analysis**

1337 Statistical analysis was performed using the GraphPad Prism 6.0 software (GraphPad  
1338 Software, Inc., USA). Differences in mean values between groups were analyzed by  
1339 Student's t-test, Mann-Whitney test or one-way ANOVA followed by post-hoc statistical  
1340 testing, where appropriate. Time dependencies were analyzed by regression analysis

1341 (F-test). Independence in contingency tables was assessed by Fisher's exact test. All  
1342 tests were realized two-sided. A P value of less than 0.05 was considered statistically  
1343 significant.

**a**

| Stage | Cancer type | DCC-isolation    | Applicat. route (N of patients)             | Mouse strain                            | Median number of injected cells or spheres | N of patient BM with DCCs | N of xenograft formed/ N of patient samples injected | Weeks until detect. | % patients with DCCs in mouse BM |
|-------|-------------|------------------|---------------------------------------------|-----------------------------------------|--------------------------------------------|---------------------------|------------------------------------------------------|---------------------|----------------------------------|
| M1    | BrCa        | CD45 depl.       | s.c. (2)<br>i.f. (2)<br>i.v. (2)<br>mfp (2) | NOD- <i>scid</i><br>IL2R $\gamma^{-/-}$ | 2x10 <sup>4</sup> cells                    | 2/2                       | 1/2                                                  | 24                  | ---                              |
| M1    | PC          | CD45 depl.       | s.c. (2)<br>i.f. (2)<br>i.v. (2)            | NOD- <i>scid</i><br>IL2R $\gamma^{-/-}$ | 5x10 <sup>3</sup> cells                    | 2/2                       | 1/2                                                  | 19                  | ---                              |
| M0    | BrCa        | CD45 depl.       | i.v. (4)                                    | NOD- <i>scid</i>                        | 1.8x10 <sup>6</sup> cells                  | 1/4*                      | 0/4                                                  | ---                 | 2/4*                             |
| M0    | BrCa        | spheres          | s.c. (1)<br>s.c. + s.r. (2)<br>mfp (10)     | NOD- <i>scid</i><br>IL2R $\gamma^{-/-}$ | 20 spheres                                 | 6/13                      | 0/13                                                 | ---                 | 0/13                             |
| M0    | PC          | EpCAM enrichment | i.v. (8)                                    | NOD- <i>scid</i>                        | 2.2x10 <sup>6</sup> cells                  | 1/8                       | 0/8                                                  | ---                 | 0/8                              |
| M0    | PC          | CD45 depl.       | i.v. (8)                                    | NOD- <i>scid</i>                        | 3.8x10 <sup>6</sup> cells                  | 3/8                       | 0/8                                                  | ---                 | 2/8                              |
| M0    | PC          | spheres          | s.c. (9)                                    | NOD- <i>scid</i><br>IL2R $\gamma^{-/-}$ | 17 spheres                                 | 7/9                       | 0/9                                                  | ---                 | 0/9                              |

\*Note: only one half of the sample's volume was injected into mice, since the other half was used for DCC enumeration (EpCAM for PC; CK for BrCa). Due to their low numbers, DCCs may have been unequally distributed, as indicated by one sample negative at DCC enumeration (see N of patient BM with DCCs), but harboring positive DCCs in mouse bone marrow (see % patients with surviving DCCs in mouse BM).

**b**

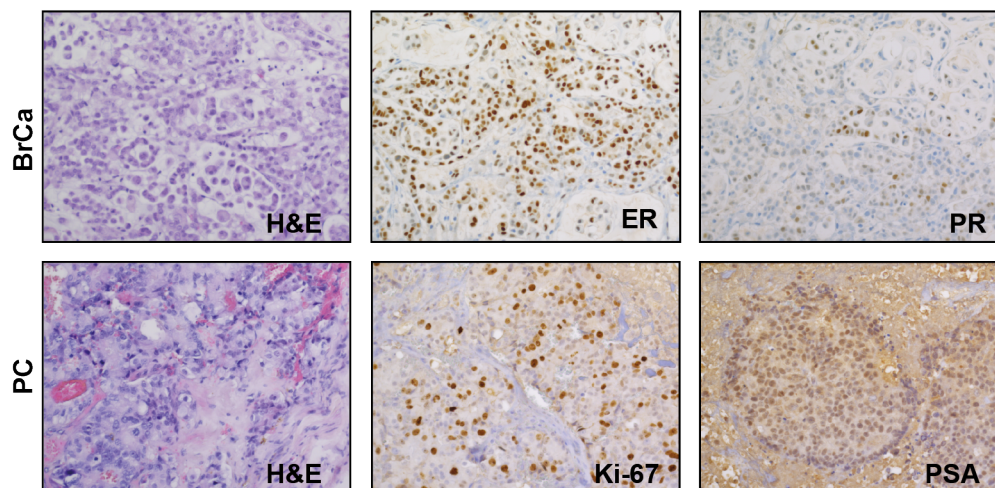

**c**

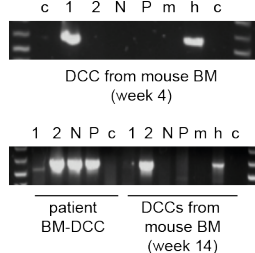

**d**

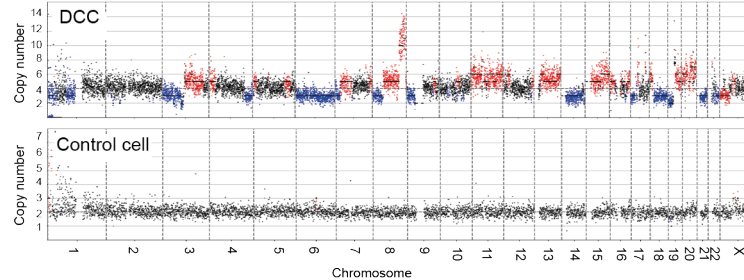

**Figure 1: Xenotransplantation of DCCs.** a Diagnostic bone marrow aspirates from breast (BrCa) or prostate (PC) cancer patients (M0- or M1- stage of disease) were either CD45-depleted, enriched for EpCAM or cultured under sphere conditions. Resulting spheres, CD45-depleted or EpCAM-enriched BM cells were injected intra-

venously (i.v.), intra-femorally (i.f.), sub-cutaneously (s.c.), sub-renally (s.r.) or into the mammary fat pad (mfp) of NOD-*scid* or NOD-*scid*IL2Rg<sup>-/-</sup> mice. Mice with sub-cutaneous or mammary fat pad injections were palpated weekly. All other mice were observed until signs of illness or were sacrificed after 9 months. Injection routes that led to xenograft formation are highlighted in red. **b** Immunohistochemistry for estrogen-receptor (ER), progesterone-receptor (PR), prostate-specific antigen (PSA), Ki-67 or H&E staining of M1-DCC-derived xenografts is shown. **c** Human EpCAM- or cytokeratin 8/18/19-expressing DCCs were detected in the BM of 4/42 mice at 4 - 14 weeks after i.v. injection of CD45-depleted BM from non-metastasized patients. DCCs from two of the four mice were isolated and their human origin was verified by a PCR specific for human *KRT19*. Pure mouse or human DNA was used as control. 1, 2 =cytokeratin 8/18/19-positive DCCs; N=cytokeratin 8/18/19-negative BM-cell, P= pool of BM-cells of recipient mouse; m=mouse positive control; h=human positive control, c=non-template control. **d** Single cell CNA analysis of the EpCAM-expressing DCC isolated at 4 weeks after injection from NSG BM (panel c) and a human hematopoietic cell as control. Red or blue indicate gain or loss of chromosomal regions.

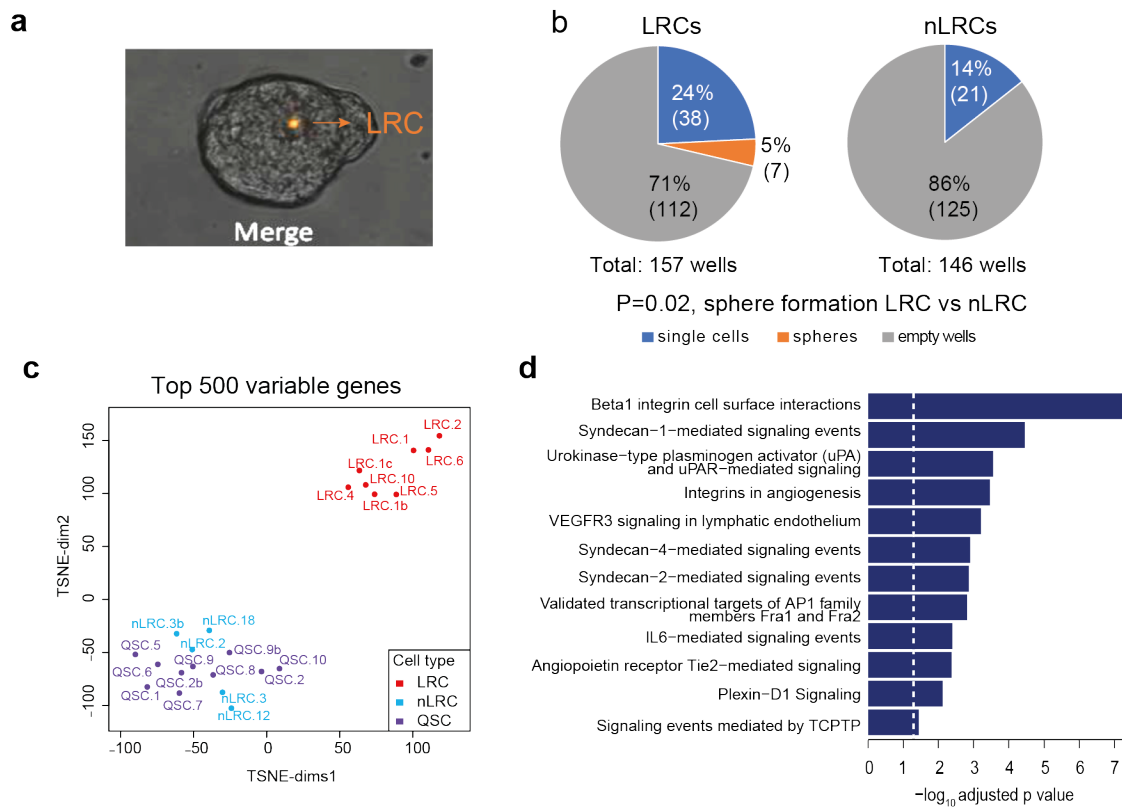

**Figure 2: IL6 pathway is activated in mammary stem cells.** **a** Representative picture of a mammosphere (day 7) generated from PKH26-labeled HMECs. **b** PKH26-labeled HMEC-mammospheres were disaggregated, sorted by flowcytometry into PKH26<sup>+</sup> LRCs and PKH26<sup>-</sup> nLRCs, plated as single cell per well and tested for sphere-formation. Shown is the percentage and in parentheses the respective absolute number of empty wells, wells with single cells and spheres after two weeks of mammosphere-culture (number of spheres vs. no spheres for LRCs vs. nLRCs, P=0.02, Fisher's exact test). **c, d** LRCs (N=8), nLRCs (N=5) and QSCs (N=10) were subjected to single cell transcriptome microarray analysis. t-SNE plot of the top 500 most variable genes (panel c). Pathway analysis using the 216 genes differentially expressed between LRCs and the pooled nLRCs plus QSCs (panel d). See Supplementary Table 1 for patient/sample-ID allocation.

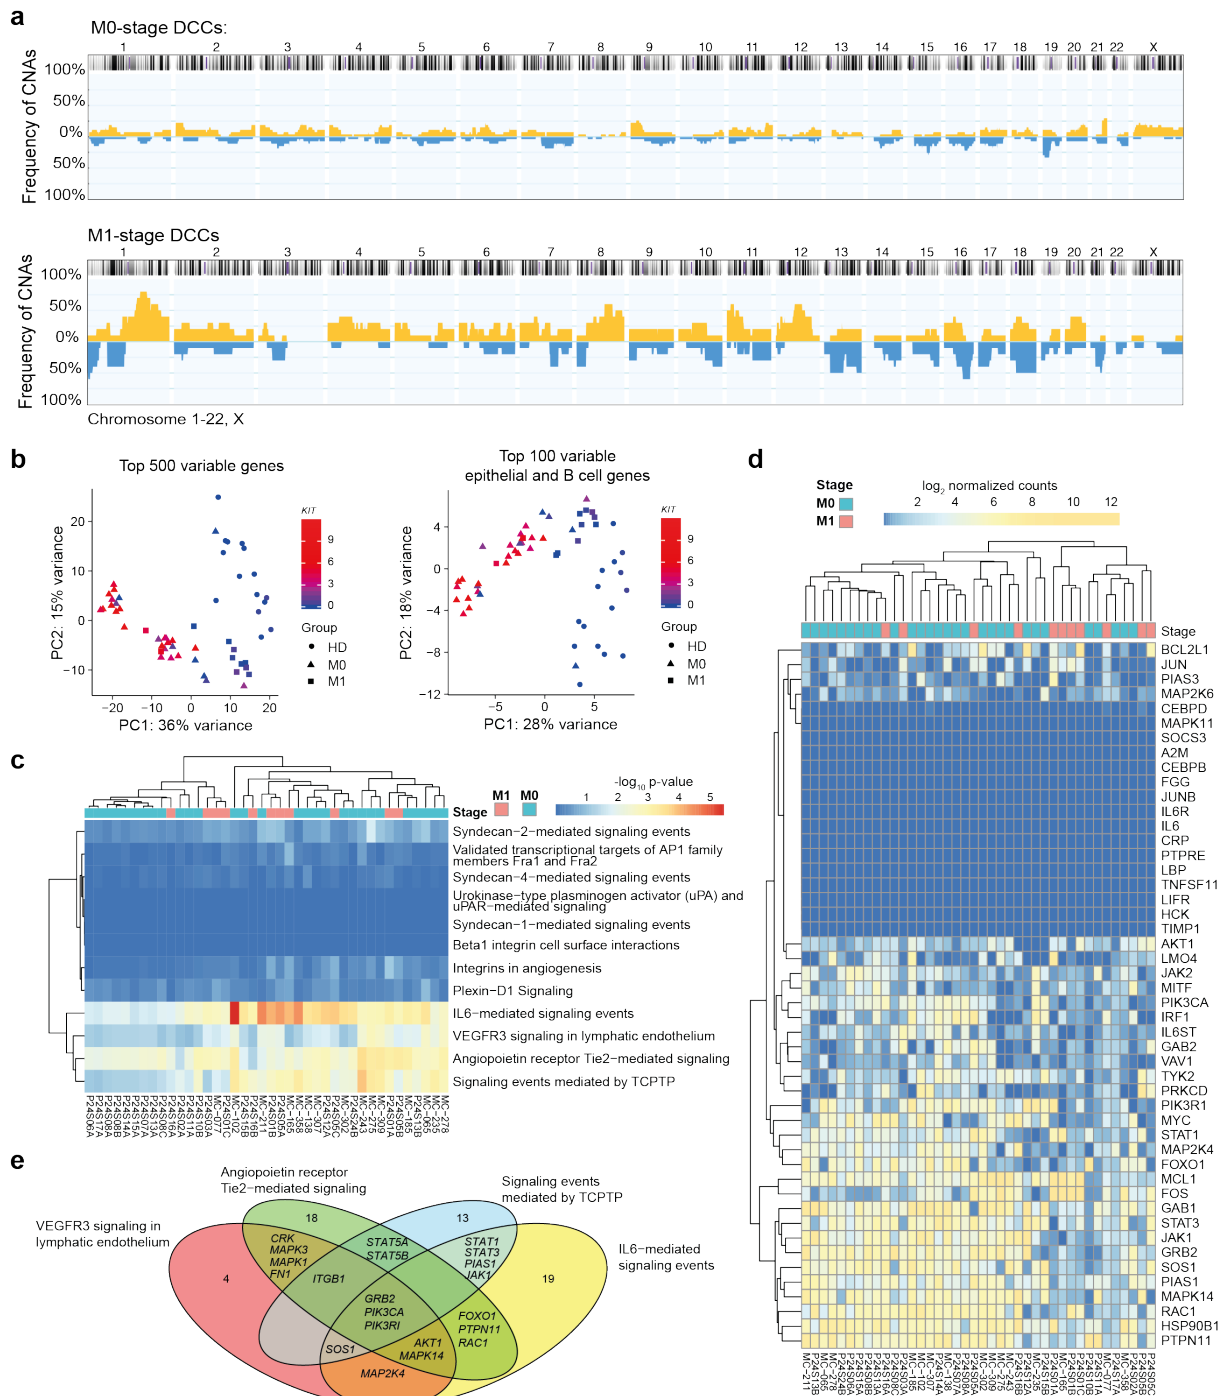

**Figure 3: IL6 pathway is activated in BM-DCCs of breast cancer patients.**

**a** DCCs from BM of 21 non-metastasized (M0-stage, N=30 DCCs) and five metastasized (M1-stage; N=11 DCCs) breast cancer patients were analyzed for CNAs. The cumulative frequency of genomic aberrations is given in yellow and blue indicating genomic gains and losses, respectively. **b, c, d, e** M0- and M1-stage DCCs and

EpCAM+ BM cells of seven healthy donors, i.e. patients without malignant disease (HD; N=15 cells) were analyzed by single cell RNA sequencing. Panel b: Principal component analysis of the top 500 most variable genes or top 100 most variable epithelial and B cell genes. Panel c: DCCs were tested for enrichment in pathways identified to be enriched in LRCs over QSCs/nLRCs (Fig. 2d). Panel d: The heatmap displays  $\log_2$  normalized read counts of mRNA expression of IL6 signaling pathway genes as listed in the NCI-Nature PID expanded by the LIFR gene. Panel e: Venn diagram for the gene-members of the four pathways (panel d) that are expressed in at least half of bone marrow DCCs (except for the BMX (5/40) and CEBPD (19/40) genes, Supplementary Fig. 1c). Pathway-private genes are annotated by their number, shared genes are named explicitly (see also Supplementary Table 5). See Supplementary Table 1 for patient/sample-ID allocation.



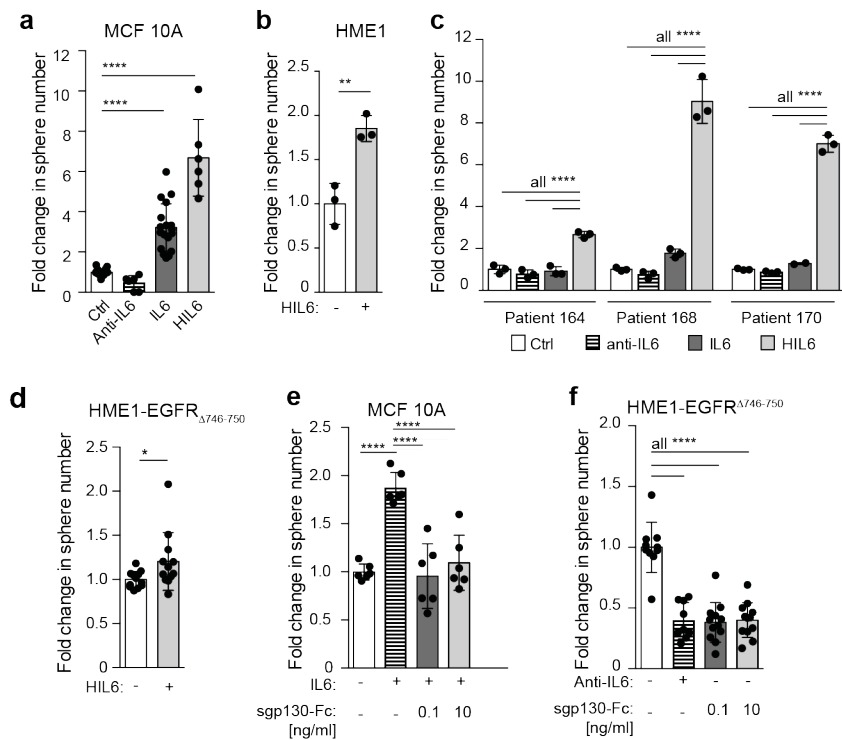

**Figure 4: IL6 trans-signaling regulates the frequency of MCF 10A, hTERT-HME1 and primary HMECs with sphere-forming ability.** **a** MCF 10A cells were cultured as spheres in the absence (N=18) or presence of IL6 (N=18), an IL6-blocking antibody (N=6) or Hyper-IL6 (N=6). **b** hTERT-HME1 were cultured as spheres in the absence (N=3) or presence (N=3) of Hyper-IL6. **c** HMECs were cultured without or with IL6, with an IL6 blocking antibody or Hyper-IL6. N=3 patients, each patient analyzed in triplicate. **d** hTERT-HME1-EGFR $\Delta$ 746-750 cells were cultured as spheres in the absence or presence of HIL6 (each N=12). **e** MCF 10A cells were cultured as spheres without (N=6) or with IL6 (N=6) and IL6 plus sgp130-Fc at indicated concentrations (each N=6). **f** Sphere formation of hTERT-HME1-EGFR $\Delta$ 746-750 in the absence (N=10) or presence of an anti-IL6 antibody (N=9) or with sgp130-Fc at indicated concentrations (each N=12). Cumulative data of three experiments. P values in panel a, c, f: one-way ANOVA with Dunnett's multiple comparisons test (post hoc); panel b, d: two-sided Student's t-test; panel e: one-way ANOVA with Tukey's multiple comparisons test (post

hoc); asterisks indicate significance between groups (\* $P < 0.05$ , \*\*  $P < 0.01$ , \*\*\*\*  $P < 0.0001$ ). All error bars correspond to standard deviation (Mean  $\pm$  SD).

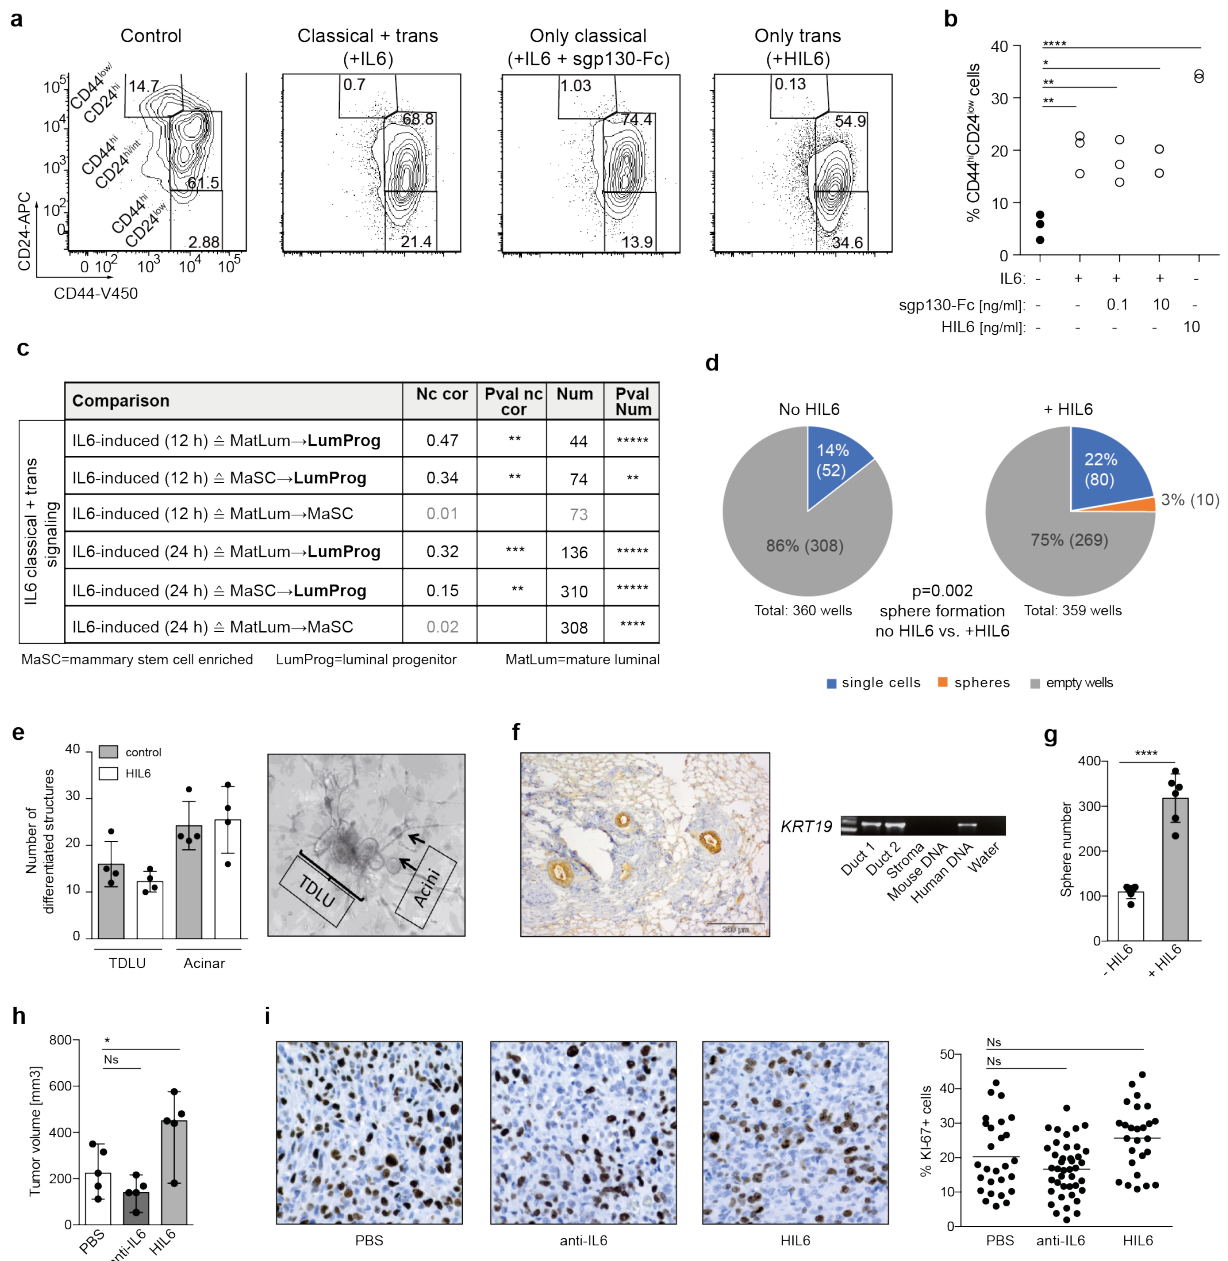

**Figure 5: IL6 trans-signaling endows non-stem cells with stem-like abilities. a, b** MCF 10A spheres were analyzed by flow cytometry for the expression of CD44 and CD24. The percentage of CD44<sup>hi</sup>CD24<sup>low</sup> expressing cells was determined. Data represent cumulative results of three independently performed experiments, each performed in triplicate. **c** Fold change correlation analysis comparing IL6-induced gene expression in MCF 10A cells at 12 and 24 hrs, respectively, with gene expression signatures of luminal progenitor (LumProg), mature luminal (MatLum) and mammary stem cell enriched cells (MaSC) according to the study of Lim et al. <sup>32</sup>. Nc cor: non-

centered correlation between fold-changes, Num: number of common differentially expressed genes; **d** LRCs and nLRCs were sorted by flow cytometry from PKH26-labeled HMEC-spheres, nLRCs were plated as single cell per well (N=3 patients, single-cell deposit determined by manual microscopic evaluation) and cultured under mammosphere-conditions with or without HIL6. Sphere-formation and survival of single cells was determined after 14 days (P values are provided within panel d). Each patient-culture was set-up as duplicate in either freshly prepared or conditioned mammosphere-medium. As no significantly different outcome (Fisher's exact test, P=0.6 and P=1 fresh vs. conditioned medium for cultures w/o HIL6 and with HIL6, respectively) was detected, results are presented as pooled analyses. **e** *In vitro* generation of acinar and tubular (TDLU) structures of primary HMECs cultured with or without HIL6 (each N=4). **f** Primary HMECs cultured with HIL6 and transplanted into NSG-mice. Staining for human cytokeratin 8/18/19 of the transplanted area eight weeks post-transplantation. PCR specific for human *KRT19* of two microdissected cytokeratin 8/18/19-positive ducts and one cytokeratin 8/18/18-negative stromal area. Pure mouse or human DNA was used as control. **g** MDA-MB-231 cells were cultured as spheres in the absence (N=6) or presence of HIL6 (N=6). **h** Tumor volume of 20,000 MDA-MB-231 cells pre-treated for 3 hours with PBS, an anti-IL6 antibody or HIL6 and transplanted into NSG-mice. All mice were analyzed at the same day after tumor cell inoculation. **i** TissueFAX cytometric quantification of tumors from panel h for the percentage of Ki-67-positive cells. N=33, 41 or 26 regions (0.25 mm<sup>2</sup> each) for PBS, anti-IL6 or HIL6. P values in panel b, h, i: one-way ANOVA with Dunnett's multiple comparisons test (post hoc); panel c: P values according to Student's t-distribution for Nc cor and hypergeometric testing for Num; panel d: Fisher's exact test; g: Student's t test; asterisks indicate significance between groups in multiple comparisons (\* P<0.05,

\*\*  $P < 0.01$ , \*\*\*\*  $P < 0.0001$ ). All error bars correspond to standard deviation (Mean  $\pm$  SD).

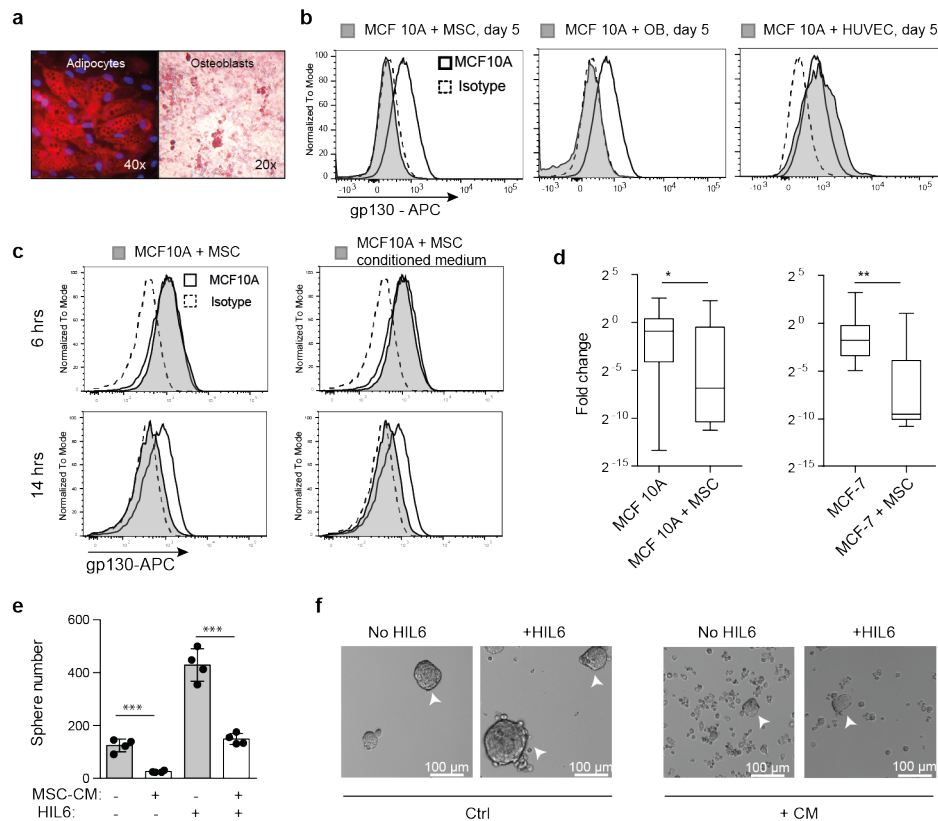

**Figure 6: Surface expression of gp130 is down-regulated by soluble factors of bone marrow stromal cells.** **a** Mesenchymal stem cells were tested for their ability to differentiate *in vitro* into adipocytes (Nil oil red O staining) and osteoblasts (Alizarin red S staining). **b** Surface gp130 expression of MCF 10A after five days of co-culture with primary mesenchymal stem cells (MSCs) from a breast cancer patient, primary osteoblasts (OBs) derived thereof or primary human umbilical vein endothelial cells (HUVECs). **c** Surface gp130 expression of MCF 10A after 6 and 14 hours of co-culture with MSCs or MSC-conditioned medium. Panel b, c: grey filled histograms indicate MCF 10A co-cultured with MSCs, OBs, HUVEC, MSC-conditioned medium or MSC separated by a transwell. Histograms with a thick black line indicate MCF 10A cells cultured alone and dashed histograms isotype control staining for gp130. **d** gp130 gene expression levels determined by single cell qPCR of MCF 10A cultured for 5 days with (N=25) or without (N=37) MSCs and MCF-7 cultured for 5 days with (N=20) or without (N=20) MSCs. Fold changes were calculated relative to MCF 10A or MCF-7

cells cultured without MSCs. **e, f** MCF 10A cells were left untreated or pre-treated for 14 hrs with MSC-conditioned medium, washed and then tested for their ability to form spheres in the presence of endogenously produced IL6/sIL6RA or exogenously added HIL6. Sphere-formation was assessed after seven days, N=4 for each group. P values according to two-sided Mann-Whitney test (panel d) or two-sided Student's t-test (panel e). Asterisks indicate significance between groups \*\*P<0.01, \*\*\*P<0.001, \*\*\*\*P<0.0001). All error bars correspond to standard deviation (Mean  $\pm$  SD).

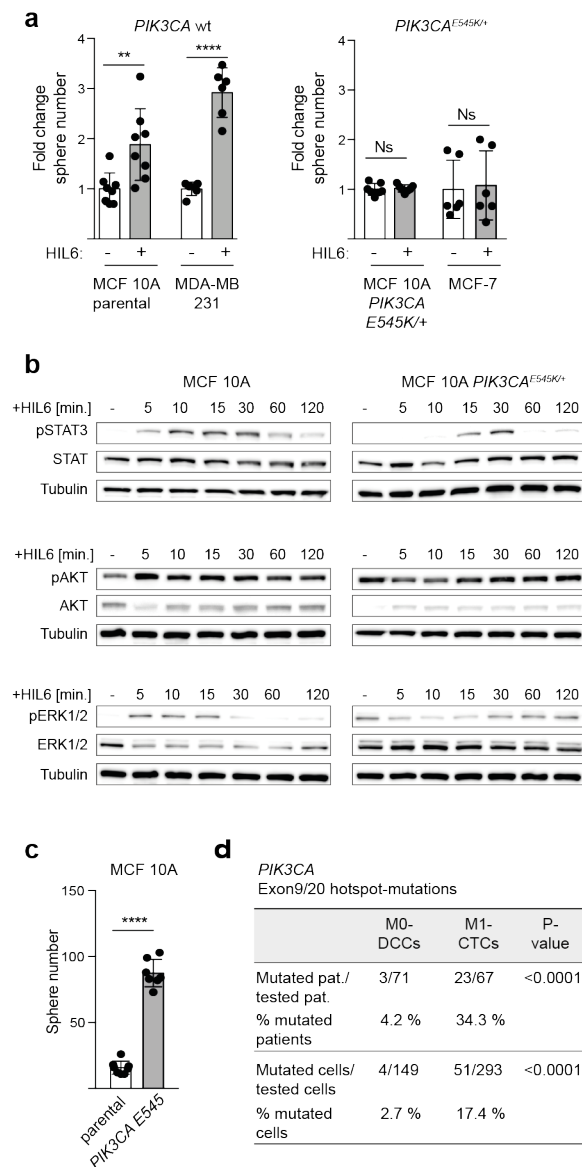

**Figure 7: Activation of the *PIK3CA* pathway renders mammary epithelial cells independent of IL6 signaling.** **a** Fold change in sphere numbers of pre-malignant (MCF 10A) and tumorigenic cell lines (MCF-7, MDA-MB-231) without (MCF 10A parental, N=8; MDA-MB-231, N=6) or with mutational activation of *PIK3CA* (MCF 10A *PIK3CA E545K/+*, N=7; MCF-7, N=6) cultured in the presence or absence of HIL6. Note that MCF 10A *PIK3CA E545K/+* cells are isogenic to MCF 10A parental. **b** Western blot analyses showing phosphorylation of STAT3<sup>Tyr705</sup>, AKT<sup>Ser475</sup> and ERK1/2<sup>Thr202/Tyr204</sup> in MCF 10A or MCF 10A *PIK3CA E545K/+* cells cultured without or with HIL6 for indicated time points. **c** Sphere numbers of the isogenic cells MCF 10A



parental (N=8) and MCF 10A *PIK3CA E545K/+* (N=7) cultured in the absence of HIL6.

**d** Cytokeratin 8/18/19<sup>+</sup> DCCs from BM of non-metastasized (M0-stage) HR-positive breast cancer patients and CD45<sup>-</sup>/EpCAM<sup>+</sup>/cytokeratin 8/18/19<sup>+</sup> CTCs isolated from peripheral blood of metastasized (M1-stage) HR-positive breast cancer patients were sequenced for hotspot-mutations in *PIK3CA* (Exon 9: E545K, E542K; Exon 20: H1047R, H1047L, M1043I). P values in panel b, c: two-sided Student's test; d: Fisher's exact test; asterisks indicate significance between groups (\*\* P<0.001 and \*\*\*\* P<0.0001). All error bars correspond to standard deviation (Mean ± SD).

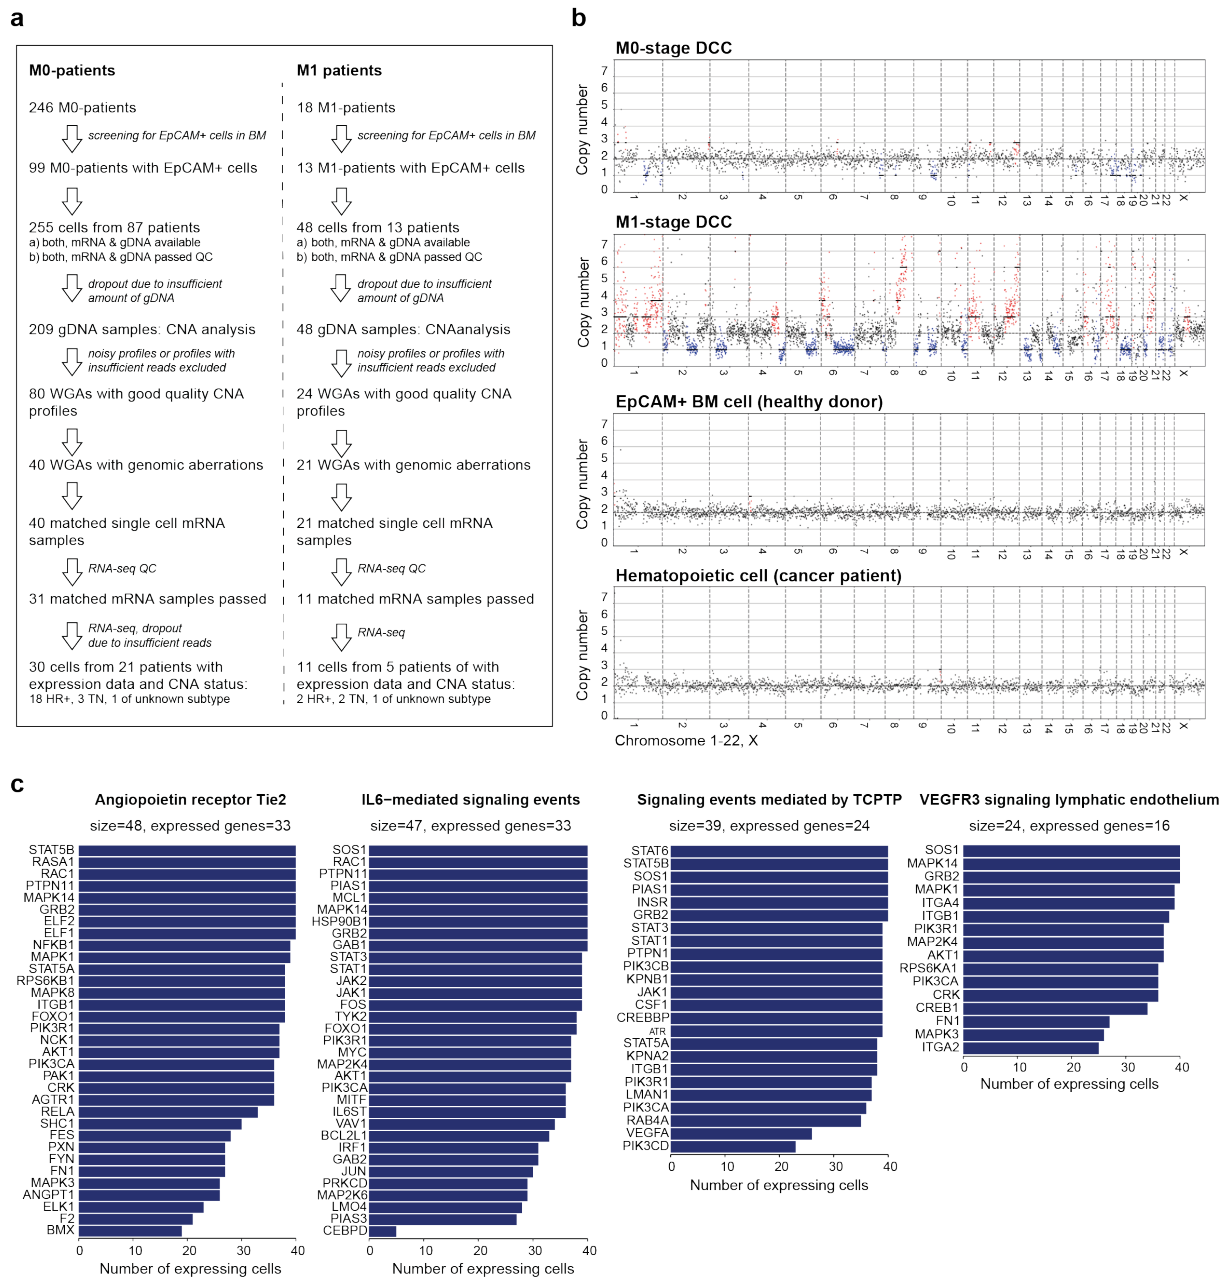

**Supplementary Figure 1: Identification and molecular analysis of DCCs from BM of breast cancer patients. a** Isolation of EpCAM<sup>+</sup> DCCs from BM of non-metastasized (M0-stage) and metastasized (M1-stage) breast cancer patients. DNA and RNA were isolated from each cell by WGA and WTA for CNA and RNAseq analysis, respectively. **b** Representative single cell CNA profiles of M0- and M1-stage DCCs and control cells (EpCAM<sup>+</sup> cell from BM of a patient without malignant disease or a hematopoietic cell of a cancer patient). **c** Number of DCCs expressing genes of pathways identified to be enriched in DCCs (see Fig. 2c).

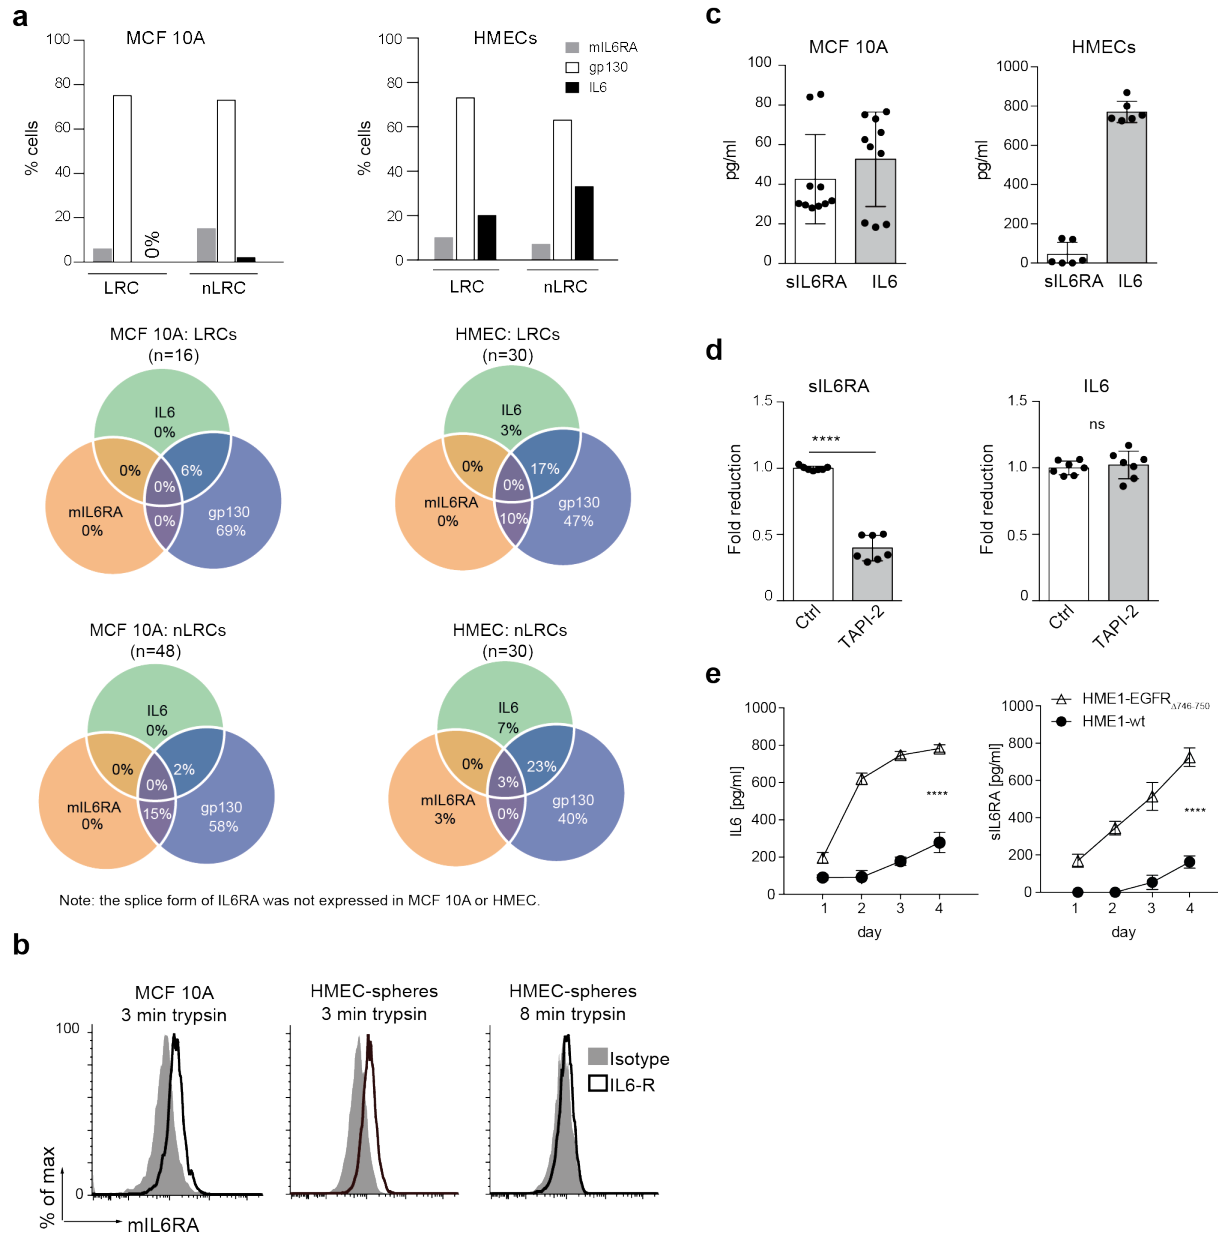

**Supplementary Figure 2: Expression of IL6 signaling molecules in MCF 10A, hTERT-HME1 and primary HMECs.** **a** Expression of IL6, mL6RA and gp130 mRNA in single LRCs or nLRCs from MCF 10A or HMEC-spheres. The spliced soluble form of IL6RA was not found to be expressed. Expression of IL6 signaling molecules did not differ significantly between LRCs and nLRCs of MCF 10A or HMECs (LRCs vs. nLRCs for IL6/mIL6Ra/gp130 in MCF10A or HMECs (Fisher's exact test, P values for all comparisons >0.05)). **b** IL6RA is expressed on the cell surface of MCF 10A cultured

under non-sphere conditions and primary HMEC-spheres. The data is representative of three independently performed experiments. **c** IL6 (N=10) and soluble IL6RA (N=10) were measured in the cell culture supernatant of MCF 10A cultured under non-sphere conditions or primary HMEC-spheres (cumulative data of three patients, each patient in duplicate). **d** MCF 10A cells were cultured under non-sphere conditions without (N=7) or with 20  $\mu$ M TAPI-2 (N=7), an inhibitor of ADAM-proteases. Protein levels of soluble IL6RA (sILRA) and IL6 in the supernatant were determined by ELISA. **e** IL6 and IL6RA in the supernatant of HME1-wt and isogenic HME1-EGFR $\Delta$ 746-750 cells cultured under non-sphere conditions was determined by ELISA. Cumulative data of three experiments, each data point in duplicate. Panel d: two-sided Student's t-test, panel e: linear regression analysis; asterisks indicate significance \* P<0.05, \*\*\*\* P<0.0001. All error bars correspond to standard deviation (Mean  $\pm$  SD).

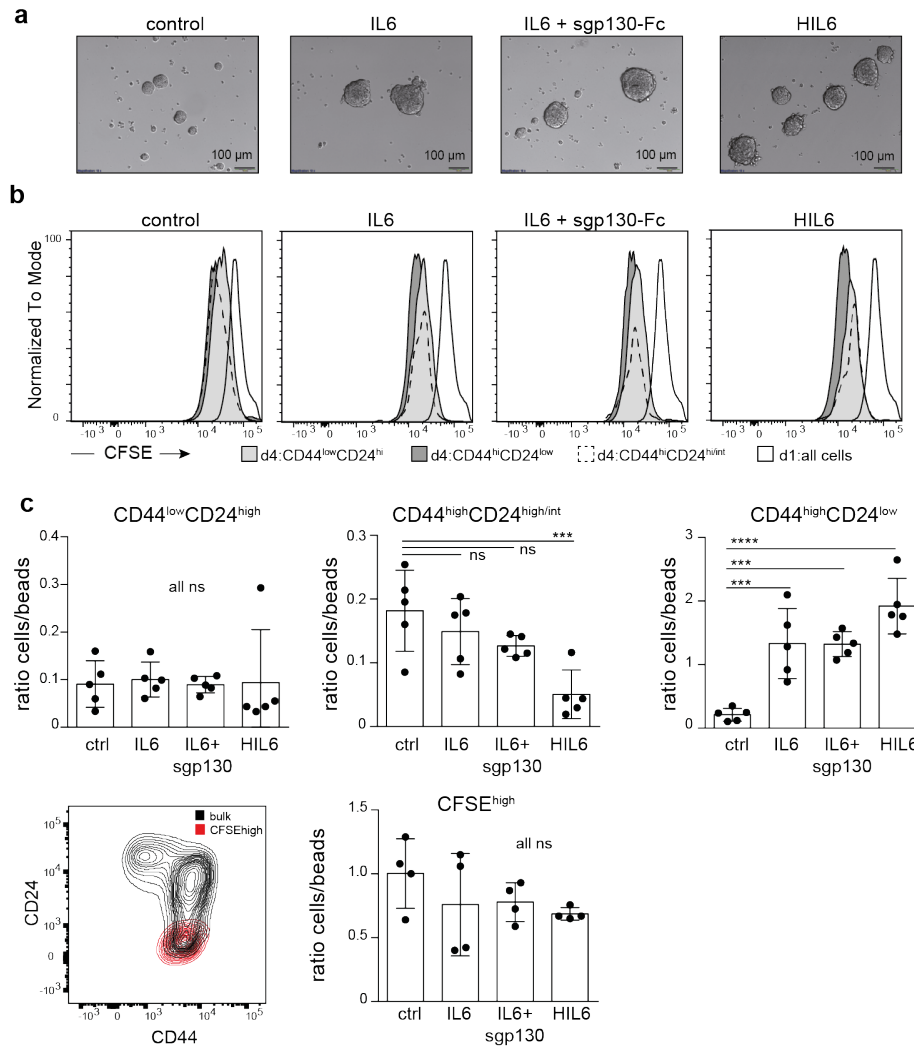

**d**

| Comparison                              | Nc cor                                                       | Pval nc cor | Num  | Pval Num |       |
|-----------------------------------------|--------------------------------------------------------------|-------------|------|----------|-------|
| IL6 classical signaling (IL6+sgp130-Fc) | IL6-induced (12 h) $\triangleq$ MatLum $\rightarrow$ LumProg | 0.58        | ***  | 30       | ***** |
|                                         | IL6-induced (12 h) $\triangleq$ MaSC $\rightarrow$ LumProg   | 0.37        | *    | 45       | **    |
|                                         | IL6-induced (12 h) $\triangleq$ MatLum $\rightarrow$ MaSC    | 0.02        |      | 42       |       |
|                                         | IL6-induced (24 h) $\triangleq$ MatLum $\rightarrow$ LumProg | 0.27        | **   | 136      | ***** |
|                                         | IL6-induced (24 h) $\triangleq$ MaSC $\rightarrow$ LumProg   | 0.10        |      | 285      | ***** |
|                                         | IL6-induced (24 h) $\triangleq$ MatLum $\rightarrow$ MaSc    | 0.05        |      | 290      | ***** |
| IL6 trans signaling (HIL6)              | IL6-induced (12 h) $\triangleq$ MatLum $\rightarrow$ LumProg | 0.32        | ***  | 119      | ***** |
|                                         | IL6-induced (12 h) $\triangleq$ MaSC $\rightarrow$ LumProg   | 0.17        | **   | 241      | ****  |
|                                         | IL6-induced (12 h) $\triangleq$ MatLum $\rightarrow$ MaSC    | 0.06        |      | 257      | **    |
|                                         | IL6-induced (24 h) $\triangleq$ MatLum $\rightarrow$ LumProg | 0.27        | **** | 230      | ***** |
|                                         | IL6-induced (24 h) $\triangleq$ MaSC $\rightarrow$ LumProg   | 0.10        | *    | 453      | ***** |
|                                         | IL6-induced (24 h) $\triangleq$ MatLum $\rightarrow$ MaSC    | 0.06        |      | 485      | ***** |

MaSC=mammary stem cell enriched LumProg=luminal progenitor MatLum=mature luminal

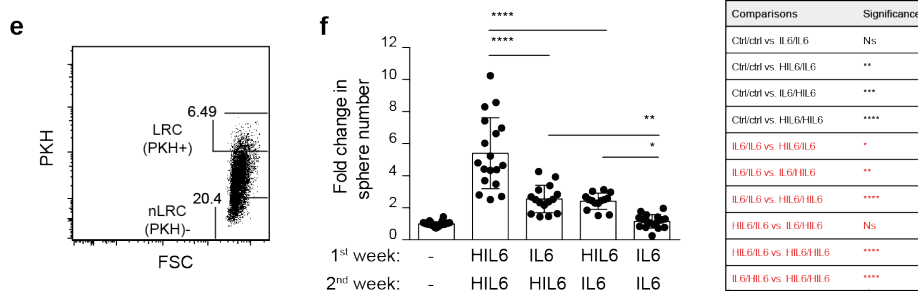

**Supplementary Figure 3: IL6 trans-signaling converts non-stem cells into stem-like cells.** **a** MCF 10A spheres cultured without or with IL6, IL6 plus sgp130-Fc or with HIL6. **b** CFSE-labeled MCF 10A cells were cultured as spheres with or without activators (IL6, HIL6) and inhibitors of classical (an anti-IL6 antibody) and trans-signaling (sgp130-Fc). CFSE-dilution in CD44<sup>high</sup>CD24<sup>low</sup>, CD44<sup>high</sup>CD24<sup>high</sup> and CD44<sup>low</sup>CD24<sup>high/intermediate</sup> cells was determined by flow cytometry at day 4. The CFSE-fluorescence intensity of all cells at day one is included as reference. Data are representative for three 3 independently performed experiments. **c** The absolute number of CD44<sup>high</sup>CD24<sup>low</sup>, CD44<sup>high</sup>CD24<sup>high</sup>, CD44<sup>low</sup>CD24<sup>high/intermediate</sup> cells (upper panel) and LRCs (CFSE<sup>high</sup>, lower panel) was determined as cell/bead ratio at day 4 by flow cytometry (N=4-5 per group). **d** Fold-change correlation analysis comparing gene expression changes induced by IL6 plus sgp130 (classical signaling) and HIL6 (trans signaling) in MCF 10 A cells at 12 and 24 hrs with the gene expression signatures of luminal progenitor (LumProg), mature luminal (MatLum) and mammary stem cell enriched cells (MaSC) according to the study of Lim et al.<sup>35</sup> Nc cor: non-centered correlation between fold-changes, Num: number of common differentially expressed genes. **e** nLRCs from primary, PKH26-labelled control mammosphere-cultures were sorted by flow cytometry as PKH<sup>-</sup> cells. **f** Primary HMECs were cultured as spheres for two consecutive rounds in the absence (N=26) or presence of HIL6 and IL6 (HIL6+HIL6, N=18; IL6+HIL6, N=15; HIL6+IL6, N=14; IL6+IL6, N=17). P values in panel c: one-way ANOVA with Dunett's multiple comparisons test (post-hoc); panel d: P values according to Student's t-distribution for Nc cor and hypergeometric testing for Num. panel f: one-way ANOVA with Tukey's multiple comparisons test (post-hoc); comparisons between groups labeled in red are depicted in the bar graph. Asterisks

indicate significance between groups (\*  $P < 0.05$  to \*\*\*\*  $P < 0.0001$ ); All error bars correspond to standard deviation (Mean  $\pm$  SD).

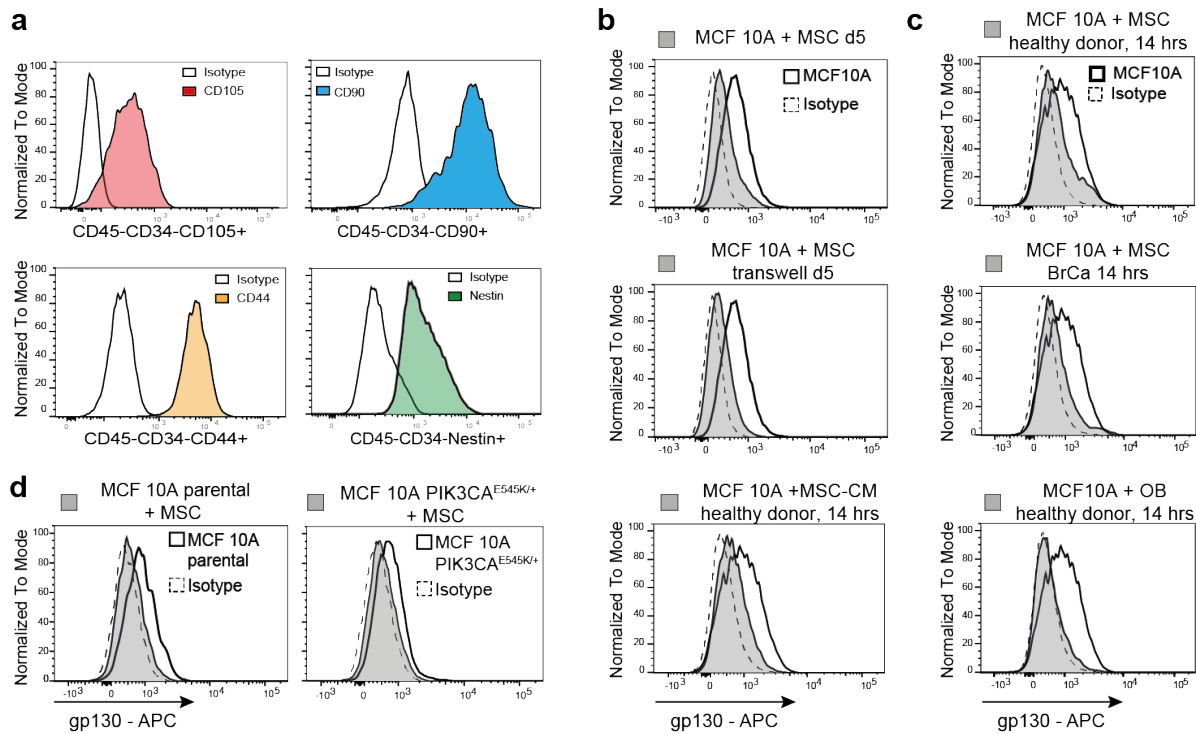

### Supplementary Figure 4: Surface expression of gp130 is down-regulated by

### soluble factors of bone marrow stromal cells. **a** MSCs isolated from bone marrow

biopsies of healthy patients or patients with non-metastasized breast cancer were

CD45<sup>-</sup>CD34<sup>-</sup>CD105<sup>+</sup>CD90<sup>+</sup>CD44<sup>+</sup>Nestin<sup>+</sup>. **b** gp130 surface expression of MCF 10A

cells after five days of co-culture with MSCs or MSCs separated by a transwell or after

14 hrs of co-culture with MSC-conditioned medium (MSC-CM). **c** gp130 surface

expression of MCF 10A cells after 14 hours of co-culture with MSCs or OBs from a

healthy donor or breast cancer patient. **d** gp130 surface expression on isogenic MCF

10A cells without (MCF 10A parental) or with activating PIK3CA<sup>E545K/+</sup> mutation

cultured with MSCs for 5 days. **Panel b, c, d:** grey filled histograms indicate MCF 10A,

MCF-7, or the isogenic cells MCF 10A parental and MCF 10A PIK3CA<sup>E545K/+</sup> cells co-

cultured with MSCs, OBs, MSC-CM or MSC separated by a transwell. Histograms with

a thick black line indicate MCF 10A, MCF-7, or the isogenic cells MCF 10A parental

and MCF 10A PIK3CA<sup>E545K/+</sup> cells cultured alone and dashed histograms isotype

control staining for gp130.



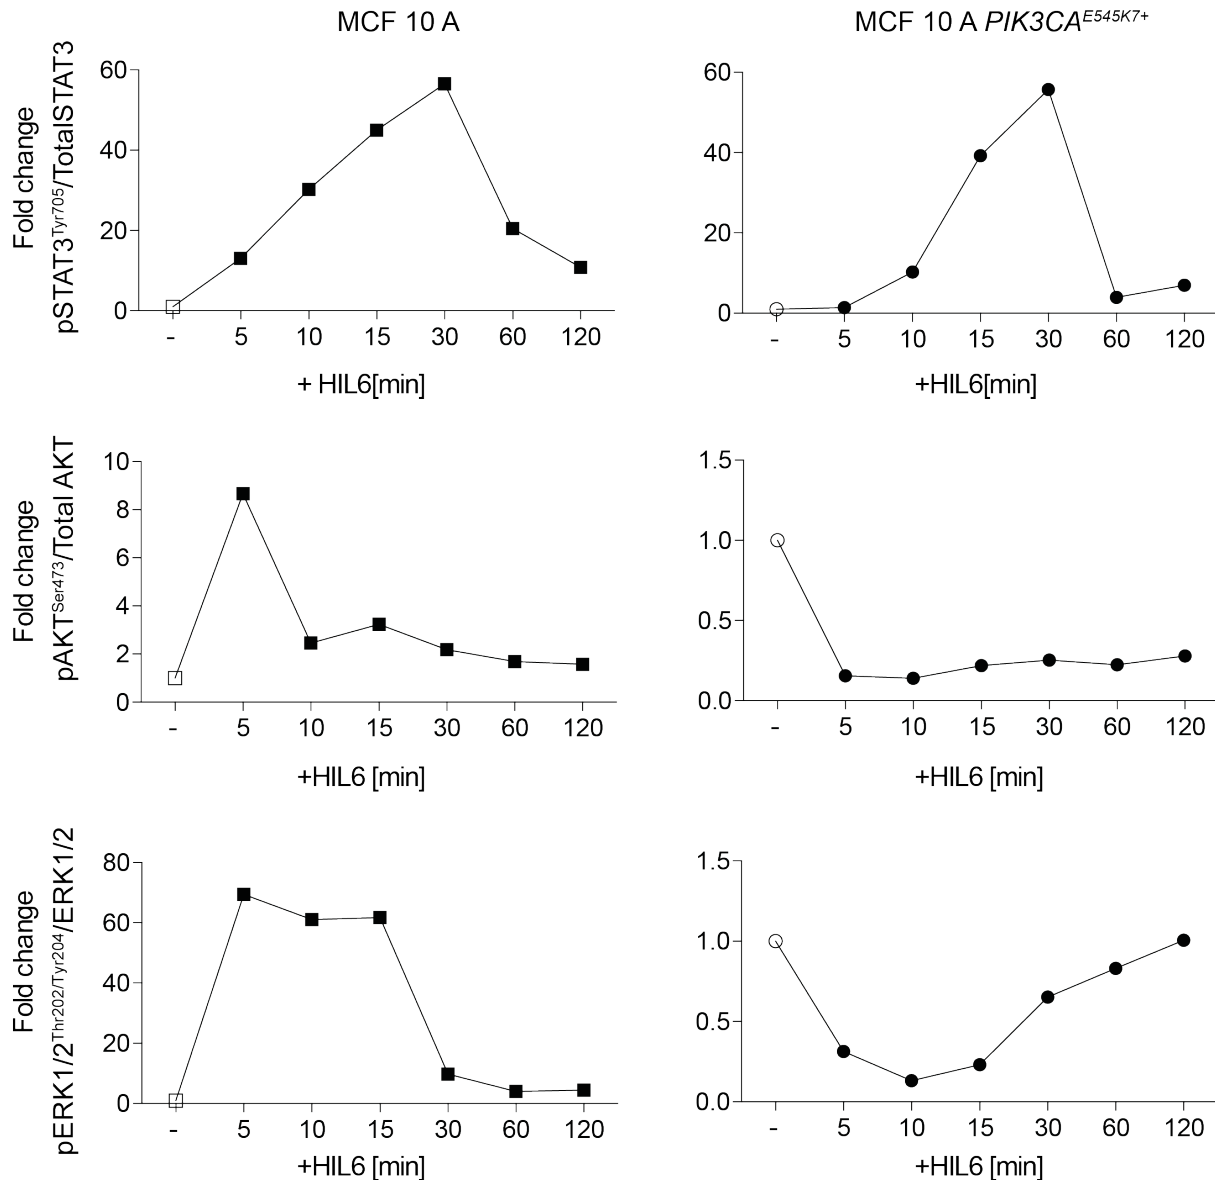

**Supplementary Figure 5: Activation of the JAK/STAT, PIK3CA/AKT and MAPK/ERK pathway by HIL6 stimulation.** Quantification of western blot analyses (Fig. 7b) showing phosphorylation of STAT3<sup>Tyr705</sup>, AKT<sup>Ser475</sup> and ERK1/2<sup>Thr202/Tyr204</sup> in MCF 10A or MCF 10A *PIK3CA* E545K/+ cells in the absence (open symbols) or presence of HIL6-stimulation (filled symbols). The signal from phosphorylated proteins and total proteins were normalized to  $\alpha$ -tubulin before the ratio of phosphorylated proteins to total proteins was calculated. The graphs show the fold change in signal ratio over time relative to the respective control (unstimulated MCF 10A or MCF 10A *PIK3CA* E545K/+).

**a**

Gating strategy for MSC-characterization

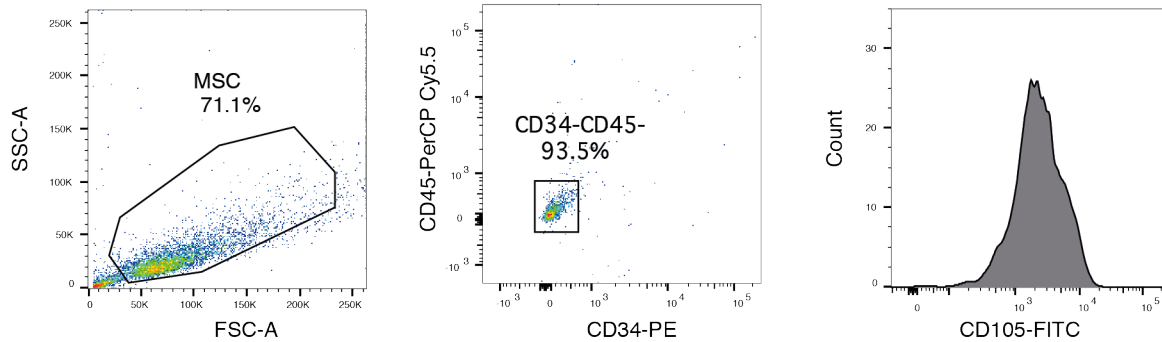

**b**

Gating strategy for gp130 analysis in MSC-MCF 10A cocultures

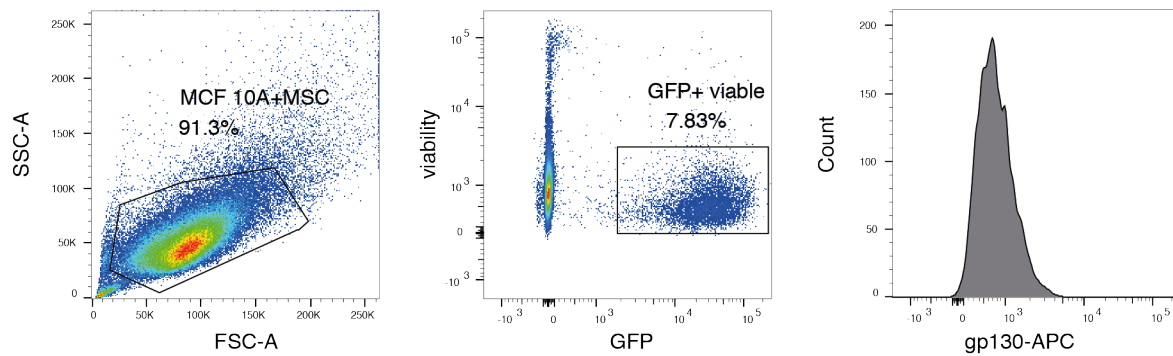

**c**

Gating strategy for CD24/CD44 analysis in MCF 10A

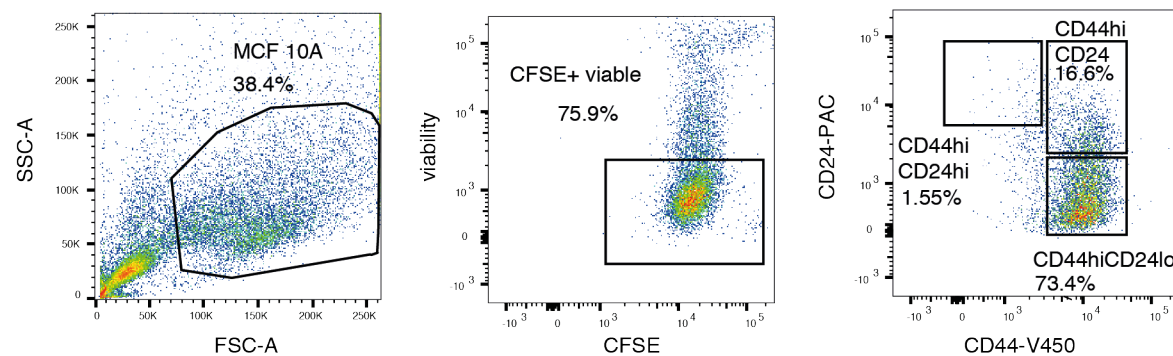

**Supplementary Figure 6: Gating strategies for flow cytometric analysis. a** MSC-characterization; **b** gp130 analysis in MCF 10A-GFP cells co-cultured with MSCs, OBs or HUVECs; **c** CD24/CD44 analysis in CFSE-labeled MCF 10A cells.
